# Supplementary material for: Genetic meta-analysis of levodopa induced dyskinesia in Parkinson’s disease
Source: Springer Nature journal article supplement (doi:10.1038/s41531-023-00573-2), 2023-08-31
Supplement: MOESM1 [file 41531_2023_573_MOESM1_ESM.pdf]

## Supplementary Online Content

### 1. eTables

**eTable 1.** Study sample sizes and genotyping array.

**eTable 2.** List of covariates added on both the basic and adjusted model across cohorts

**eTable 3.** Genomic inflation values in each cohort and meta-analysis summary statistics

**eTable 4.** Sensitivity analyses lead SNP P-values in the basic CPH model for the TPD cohort

**eTable 5.** Lead SNP P-values in the CPH model including and excluding PDBP cohort in the basic and adjusted models

**eTable 6.** List of fine-mapped consensus SNPs on each locus.

**eTable 7.** Colocalization hypotheses posterior probabilities

**eTable 8.** Candidate variants analysis.

**eTable 9.** List of DJ-1, and PARKIN intergenic variants with a significance value lower than 0.05 on the raw GWAS meta-analysis

**eTable 10.** Table of SNPs used to derive the GRS in the TPD cohort

**eTable 11.** MoCa and UPDRS score comparison between PD-LiD and PD groups

### 2. eFigures

**eFigure 1.** Quality control flowchart.

**eFigure 2.** LiD risk factors Kaplan Meyer curves.

**eFigure 3.** Power calculation and simulation.

**eFigure 4.** SNP metrics correlation between the CPH basic and best models.

**eFigure 5.** LRP8 locus fine-mapping and top 5 TFBS marks.

**eFigure 6.** XYLT1 locus fine-mapping and brain cell type specific regulatory marks.

**eFigure 7.** XYLT1 locus fine-mapping and top 5 TFBS marks.

**eFigure 8.** PRS Receiver operating characteristic (ROC) curves.

**eFigure 9.** Precision-recall curves (PROC) and the area under the curve for unweighted data.

### 3. eData

**eData 1.** List of all covariates screened in the stepwise regression model

## 1. eTables.

**eTable 1. Study sample sizes and genotyping array.**

| <b>Study Name</b>                                                     | <b>Samples source</b> | <b>Abbreviations</b> | <b>N</b> | <b>Genotyping array</b>                                                              |
|-----------------------------------------------------------------------|-----------------------|----------------------|----------|--------------------------------------------------------------------------------------|
| Tracking Parkinson's Disease                                          | UK                    | TPD                  | 2000     | Illumina HumanCoreExome array                                                        |
| Oxford Parkinson's Disease Centre<br>Discovery Cohort                 | UK                    | OPDC                 | 1082     | Illumina HumanCoreExome-12<br>v1.1 or<br>Illumina Infinium<br>HumanCoreExome-24 v1.1 |
| Parkinson's Progression Markers<br>Initiative                         | USA                   | PPMI                 | 415      | WGS                                                                                  |
| Advancing Parkinson's Disease<br>Biomarkers Discovery                 | USA                   | PDBP                 | 873      | WGS                                                                                  |
| Simvastatin as a neuroprotective<br>treatment for Parkinson's disease | UK                    | PD-STAT              | 174      | Illumina Neurochip                                                                   |

WGS = Whole Genome Sequencing

**eTable 2. List of covariates added on both the basic and adjusted model across cohorts**

| Study Name                                                         | Covariates in basic model | Covariates in the adjusted model                                                               |
|--------------------------------------------------------------------|---------------------------|------------------------------------------------------------------------------------------------|
| Tracking Parkinson's Disease                                       | AAO, SEX, 5 PCs           | AAO, SEX, 5 PCs, BASELINE DISEASE DURATION, BASELINE MDS-UPDRS-III total, BASELINE L-DOPA DOSE |
| Oxford Parkinson's Disease Centre Discovery Cohort                 | AAO, SEX, 5 PCs           | AAO, SEX, 5 PCs, BASELINE MDS-UPDRS-III total, BASELINE LEDD                                   |
| Parkinson's Progression Markers Initiative                         | AAO, SEX, 5 PCs           | AAO, SEX, 5 PCs, BASELINE MDS-UPDRS-III total, BASELINE DISEASE DURATION                       |
| Advancing Parkinson's Disease Biomarkers Discovery                 | AAD, SEX, 5 PCs           | AAD, SEX, 5 PCs, BASELINE MDS-UPDRS III total, BASELINE DISEASE DURATION                       |
| Simvastatin as a neuroprotective treatment for Parkinson's disease | AAO, SEX, 5 PCs           | AAO, SEX, 5 PCs                                                                                |

**eTable 3. Genomic inflation values in each cohort and meta-analysis summary statistics.**

| <b>Cohort Name</b> | <b>Lambda</b> |
|--------------------|---------------|
| TPD                | 1.02          |
| OPDC               | 0.99          |
| PPMI               | 0.97          |
| PDBP               | 0.87          |
| PD-STAT            | 0.73          |

**eTable 4. Sensitivity analyses lead SNP P-values in the basic CPH model for the TPD cohort**

| <b>CHR</b> | <b>BP</b> | <b>SNP</b>  | <b>A1</b> | <b>A2</b> | <b>Basic model P-value</b> | <b>Levodopa model P-value</b> | <b>MDS-UPDRS III model P-value</b> |
|------------|-----------|-------------|-----------|-----------|----------------------------|-------------------------------|------------------------------------|
| 1          | 53778300  | rs72673189  | A         | G         | 1.96E-04                   | 2.39E-04                      | 2.50E-04                           |
| 4          | 32435284  | rs189093213 | A         | G         | 6.32E-03                   | 1.89E-03                      | 3.49E-03                           |
| 16         | 17044975  | rs180924818 | G         | A         | 1.69E-04                   | 2.62E-04                      | 1.21E-04                           |

Basic model P-value = P-value on the basic model without confounding variables

Levodopa model P-value = Levodopa dose at the time point the outcome was met

MDS-UPDRS III model P-value = MDS-UPDRS III total score at the time point the outcome was met.

**eTable 5. Lead SNP P-values in the CPH model including and excluding PDBP cohort in the basic and adjusted models**

| <b>CHR:POS</b> | <b>SNP</b>  | <b>A1</b> | <b>A2</b> | <b>MAF</b> | <b>HR</b> | <b>SE</b> | <b>P-value</b> | <b>N</b> | <b>PDBP INCLUDED</b> | <b>MODEL</b> |
|----------------|-------------|-----------|-----------|------------|-----------|-----------|----------------|----------|----------------------|--------------|
| 4:32435284     | rs189093213 | A         | G         | 0.02       | 3.08      | 0.19      | 1.673e-09      | 2687     | YES                  | ADJUSTED     |
| 4:32435284     | rs189093213 | A         | G         | 0.02       | 2.73      | 0.18      | 6.154e-08      | 2784     | YES                  | BASIC        |
| 4:32435284     | rs189093213 | A         | G         | 0.02       | 3.29      | 0.19      | 6.24e-10       | 2446     | NO                   | ADJUSTED     |
| 4:32435284     | rs189093213 | A         | G         | 0.02       | 2.88      | 0.19      | 2.989e-08      | 2543     | NO                   | BASIC        |
| 16:17044975    | rs180924818 | A         | G         | 0.98       | 0.32      | 0.20      | 6.265e-09      | 2687     | YES                  | ADJUSTED     |
| 16:17044975    | rs180924818 | A         | G         | 0.98       | 0.35      | 0.19      | 8.197e-08      | 2784     | YES                  | BASIC        |
| 16:17044975    | rs180924818 | A         | G         | 0.98       | 0.32      | 0.20      | 6.265e-09      | 2446     | NO                   | ADJUSTED     |
| 16:17044975    | rs180924818 | A         | G         | 0.98       | 0.35      | 0.19      | 8.197e-08      | 2543     | NO                   | BASIC        |
| 1:53778300     | rs72673189  | A         | G         | 0.0        | 2.76      | 0.18      | 1.527e-08      | 2610     | YES                  | ADJUSTED     |
| 1:53778300     | rs72673189  | A         | G         | 0.02       | 2.72      | 0.18      | 2.654e-08      | 2707     | YES                  | BASIC        |
| 1:53778300     | rs72673189  | A         | G         | 0.02       | 2.93      | 0.19      | 1.505e-08      | 2369     | NO                   | ADJUSTED     |
| 1:53778300     | rs72673189  | A         | G         | 0.02       | 2.83      | 0.19      | 4.214e-08      | 2466     | NO                   | BASIC        |

**eTable 6. List of fine-mapped consensus SNPs on each locus.**

| SNP         | CHR | P-value | Effect | SE   | A1 | A2 | MAF  | leadSNP | ABF.PP | FINEMAP.PP | SUSIE.PP | POLYFUN_SUSIE.PP | Support | mean.PP | mean.CS | Locus     |
|-------------|-----|---------|--------|------|----|----|------|---------|--------|------------|----------|------------------|---------|---------|---------|-----------|
| rs72673189  | 1   | 1.5e-08 | 1.01   | 0.18 | A  | G  | 0.02 | TRUE    | 1      | 0          | 1        | 0                | 2       | 0.50    | 0       | LRP8      |
| rs180924818 | 16  | 6.2e-09 | -1.14  | 0.20 | A  | G  | 0.02 | TRUE    | 1      | 1          | 1        | 1                | 4       | 1       | 1       | XYLT1     |
| rs137895239 | 16  | 3.1e-05 | 0.88   | 0.21 | A  | G  | 0.02 | FALSE   | 0      | 1          | 1        | 1                | 3       | 0.75    | 0       | XYLT1     |
| rs142441980 | 16  | 1.4e-06 | 0.88   | 0.18 | A  | G  | 0.03 | FALSE   | 0.01   | 1          | 1        | 1                | 3       | 0.75    | 0       | XYLT1     |
| rs17207399  | 16  | 2e-04   | -0.47  | 0.13 | C  | G  | 0.07 | FALSE   | 1      | 1          | 1        | 1                | 3       | 0.75    | 0       | XYLT1     |
| rs189093213 | 4   | 1.7e-09 | 1.12   | 0.19 | A  | G  | 0.01 | TRUE    | 0.61   | 0.96       | 1        | 1                | 3       | 0.90    | 0       | LINC02353 |
| rs10023843  | 4   | 0.1     | 0.55   | 0.36 | T  | G  | 0.02 | FALSE   | 0      | 0          | 1        | 1                | 2       | 0.50    | 0       | LINC02353 |
| rs139511855 | 4   | 4.5e-05 | -1.09  | 0.27 | A  | G  | 0.01 | FALSE   | 0      | 0          | 1        | 1                | 2       | 0.50    | 0       | LINC02353 |
| rs147573196 | 4   | 2.5e-06 | 1.20   | 0.25 | A  | T  | 0.01 | FALSE   | 0      | 0          | 1        | 1                | 2       | 0.50    | 0       | LINC02353 |
| rs28858724  | 4   | 0.03    | -0.34  | 0.17 | A  | G  | 0.04 | FALSE   | 0      | 0          | 1        | 1                | 2       | 0.50    | 0       | LINC02353 |

leadSNP: Whether a given SNP is the locus lead SNP.

<tool>.CS: The posterior probability that a SNP is casual of the LiD phenotype.

Support: The number of fine-mapping tools that nominated the Consensus SNP

mean.PP: The mean SNP wise PP across fine mapping tools

mean.CS: If mean PP is greater than the 95% probability threshold (mean.PP > 0.95), then mean.CS is 1, else 0

**eTable 7.Colocalization hypotheses posterior probabilities**

| ENSEMBL ID      | HGNC     | nsnps | PP.H0    | PP.H1    | PP.H2 | PP.H3 | PP.H4 | ratio_PPH4_PPH3 |
|-----------------|----------|-------|----------|----------|-------|-------|-------|-----------------|
| ENSG00000162616 | DNAJB4   | 4840  | 6.76E-05 | 7.03E-05 | 0.23  | 0.24  | 0.52  | 2.17            |
| ENSG00000143067 | ZNF697   | 2881  | 2.60E-18 | 2.62E-19 | 0.72  | 0.07  | 0.21  | 2.93            |
| ENSG00000203782 | LORICRIN | 3572  | 5.25E-02 | 4.97E-03 | 0.74  | 0.07  | 0.14  | 1.96            |
| ENSG00000077254 | USP33    | 4552  | 4.54E-05 | 4.72E-05 | 0.43  | 0.44  | 0.13  | 0.30            |
| ENSG00000116266 | STXBP3   | 4434  | 1.07E-01 | 1.24E-02 | 0.72  | 0.08  | 0.08  | 0.92            |
| ENSG00000121940 | CLCC1    | 4311  | 7.44E-10 | 6.81E-11 | 0.85  | 0.08  | 0.07  | 0.92            |

nsnps: Number of overlapping SNPs between for each locus between the eqtl and the GWAS traits

PP.<hypothesis>: The posterior probability for each coloc hypothesis

ratio\_PPH4\_PPH3: The ratio of the H4 and H3 posterior probabilities (ratio = H4/H3)



**eTable 8. Candidate variants analysis.**

| Nearest gene | SNP       | MAF  | BETA  | SE   | P-value  | Direction | Publication                                 | PMID                 |
|--------------|-----------|------|-------|------|----------|-----------|---------------------------------------------|----------------------|
| ANKK1        | rs1800497 | 0.21 | 0.24  | 0.09 | 8.89E-03 | +++--     | Rieck et al. 2012                           | 23171335             |
| ANKK1        | rs2734849 | 0.50 | 0.18  | 0.08 | 2.11E-02 | +++++     | Rieck et al. 2012                           | 23171335             |
| BDNF         | rs6265    | 0.18 | 0.19  | 0.10 | 4.95E-02 | +++--     | Foltynie et al. 2009<br>Kusters et al. 2018 | 18977816<br>29191473 |
| DRD2         | rs2283265 | 0.17 | 0.16  | 0.10 | 1.06E-01 | +++--     | Rieck et al. 2012                           | 23171335             |
| DRD2         | rs6277    | 0.46 | 0.08  | 0.08 | 2.73E-01 | ----+     | Rieck et al. 2012                           | 23171335             |
| DRD2         | rs1076560 | 0.17 | 0.15  | 0.10 | 1.42E-01 | +++--     | Rieck et al. 2012                           | 23171335             |
| PRKCA        | rs4790904 | 0.22 | -0.14 | 0.10 | 1.43E-01 | -++++     | Martin-Flores et al. 2018                   | 29992529             |
| RPS6KB1      | rs1292034 | 0.42 | -0.13 | 0.08 | 1.08E-01 | -----     | Martin-Flores et al. 2018                   | 29992529             |
| OPRM1        | rs1799971 | 0.12 | -0.13 | 0.12 | 3.04E-01 | +----     | Strong et al. 2006                          | 16435402             |
| EIF4EBP2     | rs1043098 | 0.49 | 0.06  | 0.08 | 4.67E-01 | ++--      | Martin-Flores et al. 2018                   | 29992529             |
| SLC6A3       | rs393795  | 0.20 | 0.07  | 0.10 | 4.72E-01 | -++++     | Kaplan et al. 2014<br>Purcaro et al. 2018   | 24633632<br>30316985 |

| Nearest gene | SNP       | MAF  | BETA  | SE   | P-value  | Direction | Publication                                                                           | PMID                                         |
|--------------|-----------|------|-------|------|----------|-----------|---------------------------------------------------------------------------------------|----------------------------------------------|
| RICTOR       | rs2043112 | 0.40 | 0.05  | 0.08 | 5.50E-01 | ++++      | Martin-Flores et al. 2018                                                             | 29992529                                     |
| HRAS         | rs12628   | 0.35 | -0.04 | 0.08 | 5.89E-01 | +---      | Martin-Flores et al. 2018                                                             | 29992529                                     |
| RPS6KA2      | rs6456121 | 0.30 | 0.04  | 0.08 | 6.29E-01 | ++--      | Martin-Flores et al. 2018                                                             | 29992529                                     |
| COMT         | rs4680    | 0.47 | -0.03 | 0.08 | 6.65E-01 | ++--      | Bialecka et al. 2004<br>de Lau et al. 2011<br>Hao et al. 2014<br>Cheshire et al. 2014 | 15355491<br>24008922<br>25034874<br>22083803 |
| PRKN         | rs1801582 | 0.16 | -0.04 | 0.11 | 7.01E-01 | -+++      | Martin-Flores et al. 2018                                                             | 29992529                                     |
| FCHSD1       | rs456998  | 0.49 | -0.03 | 0.08 | 7.17E-01 | +--+      | Martin-Flores et al. 2018                                                             | 29992529                                     |
| DRD3         | rs6280    | 0.33 | 0.02  | 0.08 | 7.63E-01 | +--+      | Lee et al. 2011                                                                       | 20945430                                     |
| ADORA2A      | rs3761422 | 0.37 | 0.02  | 0.08 | 7.71E-01 | +---      | Rieck et al. 2015                                                                     | 25872644                                     |
| ADORA2A      | rs2298383 | 0.40 | 0.02  | 0.08 | 8.39E-01 | -+++      | Rieck et al. 2015                                                                     | 25872644                                     |
| HOMER1       | rs4704559 | 0.09 | -0.03 | 0.13 | 8.31E-01 | +++--     | Schumacher-Schuh et al. 2014                                                          | 24126708                                     |

Direction: Indicates the directionality of the effect of the variant across substudies included on each study.

**eTable9. List of DJ-1, and PARKIN intergenic variants with a significance value lower than 0.05 on the raw GWAS meta-analysis**

| SNP         | CHR | BP        | A1 | A2 | AF     | HR      | Beta    | SE     | P       | N    | GENE |
|-------------|-----|-----------|----|----|--------|---------|---------|--------|---------|------|------|
| rs113276175 | 6   | 162600287 | a  | g  | 0.9827 | 0.22723 | -1.4818 | 0.395  | 0.00018 | 601  | DJ1  |
| rs75744512  | 6   | 162326363 | a  | g  | 0.0106 | 4.3991  | 1.4814  | 0.4411 | 0.00078 | 696  | DJ1  |
| rs144098700 | 6   | 162069891 | a  | g  | 0.9849 | 0.38612 | -0.9516 | 0.3047 | 0.00179 | 1708 | DJ1  |
| rs73782962  | 6   | 162075343 | a  | g  | 0.0159 | 2.32751 | 0.8448  | 0.2723 | 0.00192 | 1991 | DJ1  |
| rs111329397 | 6   | 162171336 | a  | c  | 0.0211 | 3.86013 | 1.3507  | 0.462  | 0.00346 | 1220 | DJ1  |
| rs113585246 | 6   | 162171423 | a  | g  | 0.0211 | 3.86013 | 1.3507  | 0.462  | 0.00346 | 1220 | DJ1  |
| rs112904254 | 6   | 162172584 | a  | c  | 0.0211 | 3.86013 | 1.3507  | 0.462  | 0.00346 | 1220 | DJ1  |
| rs73782959  | 6   | 162062632 | t  | g  | 0.0154 | 2.23468 | 0.8041  | 0.2813 | 0.00426 | 1991 | DJ1  |
| rs12111122  | 6   | 162068076 | a  | t  | 0.0154 | 2.23468 | 0.8041  | 0.2813 | 0.00426 | 1991 | DJ1  |
| rs57985302  | 6   | 162071287 | a  | g  | 0.0156 | 2.22888 | 0.8015  | 0.2813 | 0.00438 | 1991 | DJ1  |
| rs56403254  | 6   | 162071717 | a  | g  | 0.0156 | 2.22888 | 0.8015  | 0.2813 | 0.00438 | 1991 | DJ1  |
| rs143041505 | 6   | 162074039 | a  | c  | 0.9844 | 0.44866 | -0.8015 | 0.2813 | 0.00438 | 1991 | DJ1  |

| SNP         | CHR | BP        | A1 | A2 | AF     | HR      | Beta    | SE     | P       | N    | GENE |
|-------------|-----|-----------|----|----|--------|---------|---------|--------|---------|------|------|
| rs6912219   | 6   | 162074100 | a  | c  | 0.9844 | 0.44866 | -0.8015 | 0.2813 | 0.00438 | 1991 | DJ1  |
| rs189617732 | 6   | 162535958 | a  | g  | 0.9287 | 0.48384 | -0.726  | 0.256  | 0.00457 | 524  | DJ1  |
| rs6908330   | 6   | 162943061 | a  | c  | 0.8908 | 0.72044 | -0.3279 | 0.1164 | 0.00484 | 2687 | DJ1  |
| rs2846480   | 6   | 162946970 | t  | c  | 0.8908 | 0.72044 | -0.3279 | 0.1164 | 0.00484 | 2687 | DJ1  |
| rs2022998   | 6   | 162941823 | t  | c  | 0.88   | 0.7287  | -0.3165 | 0.1124 | 0.00486 | 2687 | DJ1  |
| rs2846482   | 6   | 162946152 | a  | g  | 0.1099 | 1.38472 | 0.3255  | 0.1164 | 0.00518 | 2687 | DJ1  |
| rs141726555 | 6   | 162250488 | t  | c  | 0.02   | 4.82109 | 1.573   | 0.5642 | 0.0053  | 241  | DJ1  |
| rs6455760   | 6   | 162110497 | a  | g  | 0.1245 | 1.3477  | 0.2984  | 0.1086 | 0.00598 | 2687 | DJ1  |
| rs182178663 | 6   | 162102507 | a  | g  | 0.0121 | 4.63947 | 1.5346  | 0.5599 | 0.00613 | 1014 | DJ1  |
| rs150977839 | 6   | 162076149 | t  | c  | 0.9847 | 0.44731 | -0.8045 | 0.2938 | 0.00617 | 1991 | DJ1  |
| rs9355901   | 6   | 161858094 | t  | c  | 0.2626 | 1.26226 | 0.2329  | 0.0853 | 0.00633 | 2687 | DJ1  |
| rs138643736 | 6   | 161825450 | t  | c  | 0.0126 | 44.2564 | 3.79    | 1.4047 | 0.00697 | 77   | DJ1  |
| rs76437736  | 6   | 162385389 | a  | c  | 0.9833 | 0.20458 | -1.5868 | 0.5941 | 0.00756 | 318  | DJ1  |
| rs147654033 | 6   | 162051481 | t  | g  | 0.0136 | 2.366   | 0.8612  | 0.3232 | 0.00771 | 1708 | DJ1  |

| SNP         | CHR | BP        | A1 | A2 | AF     | HR      | Beta    | SE     | P       | N    | GENE  |
|-------------|-----|-----------|----|----|--------|---------|---------|--------|---------|------|-------|
| rs113276175 | 6   | 162600287 | a  | g  | 0.9827 | 0.22723 | -1.4818 | 0.395  | 0.00018 | 601  | PARKN |
| rs75744512  | 6   | 162326363 | a  | g  | 0.0106 | 4.3991  | 1.4814  | 0.4411 | 0.00078 | 696  | PARKN |
| rs144098700 | 6   | 162069891 | a  | g  | 0.9849 | 0.38612 | -0.9516 | 0.3047 | 0.00179 | 1708 | PARKN |
| rs73782962  | 6   | 162075343 | a  | g  | 0.0159 | 2.32751 | 0.8448  | 0.2723 | 0.00192 | 1991 | PARKN |
| rs111329397 | 6   | 162171336 | a  | c  | 0.0211 | 3.86013 | 1.3507  | 0.462  | 0.00346 | 1220 | PARKN |
| rs113585246 | 6   | 162171423 | a  | g  | 0.0211 | 3.86013 | 1.3507  | 0.462  | 0.00346 | 1220 | PARKN |
| rs112904254 | 6   | 162172584 | a  | c  | 0.0211 | 3.86013 | 1.3507  | 0.462  | 0.00346 | 1220 | PARKN |
| rs73782959  | 6   | 162062632 | t  | g  | 0.0154 | 2.23468 | 0.8041  | 0.2813 | 0.00426 | 1991 | PARKN |
| rs12111122  | 6   | 162068076 | a  | t  | 0.0154 | 2.23468 | 0.8041  | 0.2813 | 0.00426 | 1991 | PARKN |
| rs57985302  | 6   | 162071287 | a  | g  | 0.0156 | 2.22888 | 0.8015  | 0.2813 | 0.00438 | 1991 | PARKN |
| rs56403254  | 6   | 162071717 | a  | g  | 0.0156 | 2.22888 | 0.8015  | 0.2813 | 0.00438 | 1991 | PARKN |
| rs143041505 | 6   | 162074039 | a  | c  | 0.9844 | 0.44866 | -0.8015 | 0.2813 | 0.00438 | 1991 | PARKN |
| rs6912219   | 6   | 162074100 | a  | c  | 0.9844 | 0.44866 | -0.8015 | 0.2813 | 0.00438 | 1991 | PARKN |
| rs189617732 | 6   | 162535958 | a  | g  | 0.9287 | 0.48384 | -0.726  | 0.256  | 0.00457 | 524  | PARKN |

| SNP         | CHR | BP        | A1 | A2 | AF     | HR      | Beta    | SE     | P       | N    | GENE  |
|-------------|-----|-----------|----|----|--------|---------|---------|--------|---------|------|-------|
| rs6908330   | 6   | 162943061 | a  | c  | 0.8908 | 0.72044 | -0.3279 | 0.1164 | 0.00484 | 2687 | PARKN |
| rs2846480   | 6   | 162946970 | t  | c  | 0.8908 | 0.72044 | -0.3279 | 0.1164 | 0.00484 | 2687 | PARKN |
| rs2022998   | 6   | 162941823 | t  | c  | 0.88   | 0.7287  | -0.3165 | 0.1124 | 0.00486 | 2687 | PARKN |
| rs2846482   | 6   | 162946152 | a  | g  | 0.1099 | 1.38472 | 0.3255  | 0.1164 | 0.00518 | 2687 | PARKN |
| rs141726555 | 6   | 162250488 | t  | c  | 0.02   | 4.82109 | 1.573   | 0.5642 | 0.0053  | 241  | PARKN |
| rs6455760   | 6   | 162110497 | a  | g  | 0.1245 | 1.3477  | 0.2984  | 0.1086 | 0.00598 | 2687 | PARKN |
| rs182178663 | 6   | 162102507 | a  | g  | 0.0121 | 4.63947 | 1.5346  | 0.5599 | 0.00613 | 1014 | PARKN |
| rs150977839 | 6   | 162076149 | t  | c  | 0.9847 | 0.44731 | -0.8045 | 0.2938 | 0.00617 | 1991 | PARKN |
| rs9355901   | 6   | 161858094 | t  | c  | 0.2626 | 1.26226 | 0.2329  | 0.0853 | 0.00633 | 2687 | PARKN |
| rs138643736 | 6   | 161825450 | t  | c  | 0.0126 | 44.2564 | 3.79    | 1.4047 | 0.00697 | 77   | PARKN |
| rs76437736  | 6   | 162385389 | a  | c  | 0.9833 | 0.20458 | -1.5868 | 0.5941 | 0.00756 | 318  | PARKN |
| rs147654033 | 6   | 162051481 | t  | g  | 0.0136 | 2.366   | 0.8612  | 0.3232 | 0.00771 | 1708 | PARKN |
| rs117765565 | 6   | 162871441 | a  | t  | 0.1003 | 0.64927 | -0.4319 | 0.1628 | 0.00797 | 2445 | PARKN |
| rs1801474   | 6   | 162622197 | t  | c  | 0.0146 | 2.19614 | 0.7867  | 0.297  | 0.00808 | 2687 | PARKN |

| SNP         | CHR | BP        | A1 | A2  | AF     | HR      | Beta    | SE     | P       | N    | GENE  |
|-------------|-----|-----------|----|-----|--------|---------|---------|--------|---------|------|-------|
| rs9458505   | 6   | 162725665 | t  | c   | 0.0913 | 1.42333 | 0.353   | 0.1339 | 0.00838 | 2404 | PARKN |
| rs6914057   | 6   | 162871262 | t  | c   | 0.9005 | 1.4981  | 0.4042  | 0.1538 | 0.00857 | 2687 | PARKN |
| rs12662364  | 6   | 161855965 | a  | g   | 0.2642 | 1.24995 | 0.2231  | 0.085  | 0.00867 | 2687 | PARKN |
| rs62437986  | 6   | 162582554 | t  | c   | 0.986  | 0.2644  | -1.3303 | 0.5092 | 0.00899 | 1297 | PARKN |
| rs55912218  | 6   | 162307775 | t  | taa | 0.7153 | 1.86526 | 0.6234  | 0.2409 | 0.00966 | 281  | PARKN |
| rs149634732 | 6   | 162047729 | t  | c   | 0.0136 | 2.10244 | 0.7431  | 0.2872 | 0.00968 | 1991 | PARKN |
| rs9347542   | 6   | 162235691 | t  | c   | 0.4193 | 1.46594 | 0.3825  | 0.1486 | 0.01006 | 524  | PARKN |
| rs151243521 | 6   | 162460413 | t  | c   | 0.9833 | 0.2195  | -1.5164 | 0.5893 | 0.01007 | 318  | PARKN |
| rs112858840 | 6   | 163137317 | c  | g   | 0.9833 | 0.4205  | -0.8663 | 0.342  | 0.0113  | 1220 | PARKN |
| rs57374961  | 6   | 162615335 | c  | g   | 0.0151 | 2.09552 | 0.7398  | 0.2931 | 0.0116  | 2687 | PARKN |
| rs78718632  | 6   | 162877658 | a  | g   | 0.1009 | 0.68537 | -0.3778 | 0.1514 | 0.01258 | 2687 | PARKN |
| rs74475107  | 6   | 162877889 | a  | g   | 0.8991 | 1.45907 | 0.3778  | 0.1514 | 0.01258 | 2687 | PARKN |
| rs143941834 | 6   | 162640507 | a  | g   | 0.9842 | 0.29724 | -1.2132 | 0.4873 | 0.01278 | 524  | PARKN |
| rs75342128  | 6   | 162652000 | a  | g   | 0.9842 | 0.29724 | -1.2132 | 0.4873 | 0.01278 | 524  | PARKN |

| SNP         | CHR | BP        | A1 | A2 | AF     | HR      | Beta    | SE     | P       | N    | GENE  |
|-------------|-----|-----------|----|----|--------|---------|---------|--------|---------|------|-------|
| rs76146820  | 6   | 162707685 | a  | g  | 0.0158 | 3.36423 | 1.2132  | 0.4873 | 0.01278 | 524  | PARKN |
| rs9365407   | 6   | 162785031 | a  | g  | 0.8226 | 0.78718 | -0.2393 | 0.0964 | 0.01305 | 2687 | PARKN |
| rs6941157   | 6   | 162936188 | t  | c  | 0.0565 | 1.44672 | 0.3693  | 0.1488 | 0.01307 | 2687 | PARKN |
| rs12214138  | 6   | 162107046 | t  | c  | 0.9638 | 0.64076 | -0.4451 | 0.1829 | 0.01494 | 2687 | PARKN |
| rs118180252 | 6   | 162097162 | t  | c  | 0.0233 | 1.65367 | 0.503   | 0.2073 | 0.01524 | 2687 | PARKN |
| rs60095244  | 6   | 162946561 | t  | c  | 0.0564 | 1.42975 | 0.3575  | 0.1489 | 0.01636 | 2687 | PARKN |
| rs60074916  | 6   | 162946564 | t  | c  | 0.0564 | 1.42975 | 0.3575  | 0.1489 | 0.01636 | 2687 | PARKN |
| rs16892937  | 6   | 162125691 | t  | c  | 0.0188 | 1.74072 | 0.5543  | 0.2312 | 0.01651 | 2687 | PARKN |
| rs192576507 | 6   | 162715710 | t  | c  | 0.9916 | 0.02812 | -3.5714 | 1.4967 | 0.01703 | 77   | PARKN |
| rs80330859  | 6   | 162859951 | c  | g  | 0.9031 | 1.44037 | 0.3649  | 0.1533 | 0.01726 | 2687 | PARKN |
| rs59996420  | 6   | 162122039 | a  | g  | 0.9811 | 0.57782 | -0.5485 | 0.2312 | 0.01767 | 2687 | PARKN |
| rs62430696  | 6   | 162752612 | t  | c  | 0.9808 | 0.56666 | -0.568  | 0.24   | 0.01795 | 2687 | PARKN |
| rs62430697  | 6   | 162753224 | t  | c  | 0.0192 | 1.76473 | 0.568   | 0.24   | 0.01795 | 2687 | PARKN |
| rs9458572   | 6   | 162935431 | t  | c  | 0.0507 | 1.44023 | 0.3648  | 0.1543 | 0.0181  | 2687 | PARKN |



| SNP         | CHR | BP        | A1 | A2 | AF     | HR       | Beta    | SE     | P       | N    | GENE  |
|-------------|-----|-----------|----|----|--------|----------|---------|--------|---------|------|-------|
| rs374239029 | 6   | 162777567 | a  | at | 0.7438 | 1.87142  | 0.6267  | 0.2653 | 0.01816 | 283  | PARKN |
| rs73597197  | 6   | 162124704 | t  | c  | 0.9808 | 0.58077  | -0.5434 | 0.2313 | 0.01882 | 2687 | PARKN |
| rs9365410   | 6   | 162795058 | t  | c  | 0.061  | 1.40649  | 0.3411  | 0.1462 | 0.0196  | 2687 | PARKN |
| rs79565809  | 6   | 162119637 | a  | g  | 0.0189 | 1.71412  | 0.5389  | 0.2312 | 0.01974 | 2687 | PARKN |
| rs1016085   | 6   | 162242404 | t  | c  | 0.7634 | 0.81595  | -0.2034 | 0.0873 | 0.01979 | 2687 | PARKN |
| rs116357950 | 6   | 161970866 | t  | c  | 0.0338 | 1.64001  | 0.4947  | 0.2125 | 0.01992 | 2687 | PARKN |
| rs186614596 | 6   | 162534882 | t  | c  | 0.0589 | 0.25576  | -1.3635 | 0.5862 | 0.02001 | 524  | PARKN |
| rs111367465 | 6   | 162535731 | a  | c  | 0.0589 | 0.25576  | -1.3635 | 0.5862 | 0.02001 | 524  | PARKN |
| rs62437978  | 6   | 162573952 | a  | g  | 0.0084 | 29.45312 | 3.3828  | 1.4632 | 0.02078 | 77   | PARKN |
| rs140706721 | 6   | 162477163 | t  | c  | 0.0085 | 3.42123  | 1.23    | 0.5357 | 0.02166 | 773  | PARKN |
| rs146099223 | 6   | 162563818 | a  | g  | 0.0085 | 3.42123  | 1.23    | 0.5357 | 0.02166 | 773  | PARKN |
| rs150553548 | 6   | 162695552 | a  | t  | 0.0104 | 2.66153  | 0.9789  | 0.4264 | 0.02169 | 1390 | PARKN |
| rs144698234 | 6   | 162715035 | a  | g  | 0.0104 | 2.66153  | 0.9789  | 0.4264 | 0.02169 | 1390 | PARKN |
| rs79026473  | 6   | 162097898 | a  | c  | 0.9761 | 0.62744  | -0.4661 | 0.2033 | 0.02185 | 2687 | PARKN |

| SNP         | CHR | BP        | A1 | A2 | AF     | HR       | Beta    | SE     | P       | N    | GENE  |
|-------------|-----|-----------|----|----|--------|----------|---------|--------|---------|------|-------|
| rs9458348   | 6   | 162149539 | t  | c  | 0.7107 | 0.82456  | -0.1929 | 0.0841 | 0.02186 | 2687 | PARKN |
| rs74922818  | 6   | 162696500 | a  | c  | 0.0107 | 2.65727  | 0.9773  | 0.4264 | 0.02191 | 1390 | PARKN |
| rs138089003 | 6   | 162354879 | t  | g  | 0.0168 | 7.86797  | 2.0628  | 0.9004 | 0.02197 | 77   | PARKN |
| rs138771484 | 6   | 162432979 | t  | c  | 0.979  | 0.1271   | -2.0628 | 0.9004 | 0.02197 | 77   | PARKN |
| rs60883055  | 6   | 162611302 | t  | c  | 0.9769 | 0.57132  | -0.5598 | 0.2451 | 0.02238 | 2687 | PARKN |
| rs140432232 | 6   | 162843810 | c  | g  | 0.9028 | 1.41397  | 0.3464  | 0.1519 | 0.0226  | 2687 | PARKN |
| rs192586459 | 6   | 162876746 | t  | c  | 0.1081 | 0.45841  | -0.78   | 0.3422 | 0.02263 | 524  | PARKN |
| rs188082227 | 6   | 162723904 | a  | t  | 0.0168 | 10.47614 | 2.3491  | 1.033  | 0.02296 | 77   | PARKN |
| rs6930628   | 6   | 162110806 | a  | g  | 0.0218 | 1.65004  | 0.5008  | 0.2203 | 0.02301 | 2687 | PARKN |
| rs16892913  | 6   | 162112309 | a  | t  | 0.9782 | 0.60605  | -0.5008 | 0.2203 | 0.02301 | 2687 | PARKN |
| rs76290633  | 6   | 162116665 | a  | g  | 0.0218 | 1.65004  | 0.5008  | 0.2203 | 0.02301 | 2687 | PARKN |
| rs4709541   | 6   | 162103294 | a  | g  | 0.2062 | 0.78852  | -0.2376 | 0.1046 | 0.02306 | 2687 | PARKN |
| rs11751911  | 6   | 162235611 | t  | c  | 0.2516 | 0.80961  | -0.2112 | 0.0931 | 0.02329 | 2687 | PARKN |
| rs4708931   | 6   | 162190804 | a  | c  | 0.949  | 0.65423  | -0.4243 | 0.188  | 0.02402 | 1914 | PARKN |

| SNP         | CHR | BP        | A1 | A2 | AF     | HR       | Beta    | SE     | P       | N    | GENE  |
|-------------|-----|-----------|----|----|--------|----------|---------|--------|---------|------|-------|
| rs4455643   | 6   | 161852968 | t  | c  | 0.7346 | 0.82572  | -0.1915 | 0.085  | 0.02437 | 2687 | PARKN |
| rs9347509   | 6   | 161853203 | a  | g  | 0.7346 | 0.82572  | -0.1915 | 0.085  | 0.02437 | 2687 | PARKN |
| rs62436001  | 6   | 162391014 | t  | c  | 0.0159 | 2.99936  | 1.0984  | 0.4884 | 0.0245  | 1220 | PARKN |
| rs77460805  | 6   | 162773895 | c  | g  | 0.892  | 1.37479  | 0.3183  | 0.1423 | 0.02535 | 2687 | PARKN |
| rs10755584  | 6   | 162469736 | t  | c  | 0.8648 | 0.77942  | -0.2492 | 0.1115 | 0.02542 | 2687 | PARKN |
| rs117230217 | 6   | 162296735 | t  | c  | 0.0283 | 2.7871   | 1.025   | 0.4627 | 0.02672 | 524  | PARKN |
| rs9295181   | 6   | 162481460 | t  | c  | 0.5783 | 0.83937  | -0.1751 | 0.0793 | 0.02729 | 2687 | PARKN |
| rs568459658 | 6   | 162192301 | t  | c  | 0.9833 | 0.54313  | -0.6104 | 0.2772 | 0.02765 | 2687 | PARKN |
| rs557347438 | 6   | 162227423 | a  | c  | 0.0168 | 22.20017 | 3.1001  | 1.412  | 0.02812 | 77   | PARKN |
| rs62429614  | 6   | 162940960 | t  | c  | 0.9816 | 0.5351   | -0.6253 | 0.2871 | 0.0294  | 2610 | PARKN |
| rs78907851  | 6   | 162727657 | t  | c  | 0.0582 | 1.38085  | 0.3227  | 0.1486 | 0.02984 | 2687 | PARKN |
| rs9364650   | 6   | 162728256 | a  | c  | 0.9418 | 0.72419  | -0.3227 | 0.1486 | 0.02984 | 2687 | PARKN |
| rs75157574  | 6   | 162434018 | t  | c  | 0.025  | 1.7291   | 0.5476  | 0.2541 | 0.03112 | 1991 | PARKN |
| rs79220797  | 6   | 162835227 | a  | g  | 0.9026 | 1.38292  | 0.3242  | 0.1506 | 0.03133 | 2687 | PARKN |

| SNP         | CHR | BP        | A1 | A2 | AF     | HR      | Beta    | SE     | P       | N    | GENE  |
|-------------|-----|-----------|----|----|--------|---------|---------|--------|---------|------|-------|
| rs10945811  | 6   | 162738512 | a  | g  | 0.0582 | 1.37754 | 0.3203  | 0.1488 | 0.03134 | 2687 | PARKN |
| rs9355898   | 6   | 161847010 | t  | c  | 0.2694 | 0.67086 | -0.3992 | 0.1858 | 0.03164 | 524  | PARKN |
| rs75923621  | 6   | 162830552 | a  | t  | 0.097  | 0.72368 | -0.3234 | 0.1506 | 0.03173 | 2687 | PARKN |
| rs79699210  | 6   | 162834650 | a  | g  | 0.097  | 0.72368 | -0.3234 | 0.1506 | 0.03173 | 2687 | PARKN |
| rs74892485  | 6   | 162834786 | t  | c  | 0.097  | 0.72368 | -0.3234 | 0.1506 | 0.03173 | 2687 | PARKN |
| rs78174510  | 6   | 162839960 | t  | c  | 0.9026 | 1.38182 | 0.3234  | 0.1506 | 0.03175 | 2687 | PARKN |
| rs12210160  | 6   | 161814907 | a  | g  | 0.897  | 1.34299 | 0.2949  | 0.1374 | 0.0318  | 2687 | PARKN |
| rs2186815   | 6   | 162886686 | a  | g  | 0.052  | 1.40214 | 0.338   | 0.1575 | 0.03186 | 2687 | PARKN |
| rs78964633  | 6   | 162837366 | t  | c  | 0.0972 | 0.7239  | -0.3231 | 0.1506 | 0.03193 | 2687 | PARKN |
| rs11753929  | 6   | 162088198 | t  | c  | 0.9785 | 0.59156 | -0.525  | 0.245  | 0.03211 | 2687 | PARKN |
| rs71653628  | 6   | 161770811 | t  | g  | 0.044  | 1.44773 | 0.37    | 0.1727 | 0.03219 | 2687 | PARKN |
| rs146512832 | 6   | 162220484 | c  | g  | 0.9876 | 0.25173 | -1.3794 | 0.6462 | 0.0328  | 283  | PARKN |
| rs62430699  | 6   | 162774531 | a  | g  | 0.01   | 5.76036 | 1.751   | 0.8253 | 0.03387 | 241  | PARKN |
| rs747295    | 6   | 162888355 | t  | c  | 0.9061 | 0.77136 | -0.2596 | 0.1227 | 0.03445 | 2687 | PARKN |

| SNP         | CHR | BP        | A1 | A2 | AF     | HR      | Beta    | SE     | P       | N    | GENE  |
|-------------|-----|-----------|----|----|--------|---------|---------|--------|---------|------|-------|
| rs75888372  | 6   | 162804109 | t  | g  | 0.9029 | 1.37383 | 0.3176  | 0.1505 | 0.03485 | 2687 | PARKN |
| rs114696305 | 6   | 162812684 | a  | g  | 0.0974 | 0.72826 | -0.3171 | 0.1504 | 0.03494 | 2687 | PARKN |
| rs35029799  | 6   | 162283430 | a  | g  | 0.9207 | 0.76208 | -0.2717 | 0.1294 | 0.03577 | 2687 | PARKN |
| rs6455759   | 6   | 162106439 | t  | c  | 0.2119 | 0.80541 | -0.2164 | 0.1031 | 0.03581 | 2687 | PARKN |
| rs542536086 | 6   | 163141639 | t  | c  | 0.0117 | 4.93573 | 1.5965  | 0.7635 | 0.03653 | 241  | PARKN |
| rs78648977  | 6   | 162803458 | t  | g  | 0.01   | 5.47504 | 1.7002  | 0.8151 | 0.03699 | 241  | PARKN |
| rs9347599   | 6   | 162611892 | t  | c  | 0.0145 | 1.83639 | 0.6078  | 0.2915 | 0.03707 | 2687 | PARKN |
| rs9355933   | 6   | 162190430 | a  | t  | 0.0505 | 1.48676 | 0.3966  | 0.1904 | 0.03719 | 1914 | PARKN |
| rs4708930   | 6   | 162190759 | t  | c  | 0.0505 | 1.48676 | 0.3966  | 0.1904 | 0.03719 | 1914 | PARKN |
| rs1001091   | 6   | 162237057 | a  | g  | 0.7275 | 1.20889 | 0.1897  | 0.091  | 0.03719 | 2687 | PARKN |
| rs2849564   | 6   | 162459664 | t  | c  | 0.3709 | 1.17998 | 0.1655  | 0.0794 | 0.03728 | 2687 | PARKN |
| rs79084151  | 6   | 162832167 | t  | g  | 0.8978 | 1.35256 | 0.302   | 0.1452 | 0.03758 | 2687 | PARKN |
| rs1122327   | 6   | 162235108 | t  | c  | 0.3028 | 1.1891  | 0.1732  | 0.0833 | 0.0376  | 2687 | PARKN |
| rs74778695  | 6   | 162931570 | a  | g  | 0.0229 | 2.35608 | 0.857   | 0.4123 | 0.03768 | 601  | PARKN |

| SNP         | CHR | BP        | A1 | A2    | AF     | HR       | Beta    | SE     | P       | N    | GENE  |
|-------------|-----|-----------|----|-------|--------|----------|---------|--------|---------|------|-------|
| rs6914080   | 6   | 162871297 | t  | c     | 0.6423 | 0.84764  | -0.1653 | 0.0795 | 0.03769 | 2687 | PARKN |
| rs9295150   | 6   | 161885096 | a  | g     | 0.0213 | 1.64132  | 0.4955  | 0.2386 | 0.03781 | 2610 | PARKN |
| rs9458453   | 6   | 162502852 | a  | t     | 0.5467 | 1.17774  | 0.1636  | 0.0788 | 0.03794 | 2687 | PARKN |
| rs200316663 | 6   | 162697733 | g  | gtgtc | 0.9466 | 2.68451  | 0.9875  | 0.4759 | 0.03797 | 524  | PARKN |
| rs192572757 | 6   | 162531271 | t  | c     | 0.979  | 0.09673  | -2.3358 | 1.1288 | 0.03851 | 77   | PARKN |
| rs141512658 | 6   | 162552268 | a  | c     | 0.021  | 10.33773 | 2.3358  | 1.1288 | 0.03851 | 77   | PARKN |
| rs4314474   | 6   | 162518553 | t  | c     | 0.3262 | 1.39766  | 0.3348  | 0.162  | 0.03869 | 524  | PARKN |
| rs75856612  | 6   | 162513392 | a  | g     | 0.9883 | 0.19311  | -1.6445 | 0.7973 | 0.03916 | 241  | PARKN |
| rs73013498  | 6   | 162139284 | a  | g     | 0.2006 | 1.21933  | 0.1983  | 0.0963 | 0.0395  | 2687 | PARKN |
| rs2851401   | 6   | 162459762 | t  | c     | 0.4967 | 1.1721   | 0.1588  | 0.0772 | 0.03984 | 2687 | PARKN |
| rs7758666   | 6   | 162249776 | a  | c     | 0.2845 | 1.19017  | 0.1741  | 0.0848 | 0.04005 | 2687 | PARKN |
| rs12205900  | 6   | 162094674 | a  | g     | 0.0339 | 1.4755   | 0.389   | 0.1901 | 0.04071 | 2687 | PARKN |
| rs60798458  | 6   | 161847112 | a  | c     | 0.1307 | 1.7369   | 0.5521  | 0.2705 | 0.04126 | 283  | PARKN |
| rs9365409   | 6   | 162792379 | t  | c     | 0.1907 | 1.20852  | 0.1894  | 0.0931 | 0.04194 | 2687 | PARKN |

| SNP         | CHR | BP        | A1 | A2 | AF     | HR      | Beta    | SE     | P       | N    | GENE  |
|-------------|-----|-----------|----|----|--------|---------|---------|--------|---------|------|-------|
| rs117076984 | 6   | 162991852 | c  | g  | 0.0302 | 1.56721 | 0.4493  | 0.2215 | 0.04248 | 2687 | PARKN |
| rs112765480 | 6   | 162770514 | c  | g  | 0.9805 | 0.60854 | -0.4967 | 0.2459 | 0.04342 | 2687 | PARKN |
| rs12193568  | 6   | 162557719 | a  | g  | 0.7507 | 0.83644 | -0.1786 | 0.0886 | 0.04393 | 2687 | PARKN |
| rs4709569   | 6   | 162503148 | a  | c  | 0.5455 | 1.17128 | 0.1581  | 0.0787 | 0.04455 | 2687 | PARKN |
| rs1001090   | 6   | 162237100 | a  | g  | 0.7292 | 1.19973 | 0.1821  | 0.0909 | 0.04516 | 2687 | PARKN |
| rs9458452   | 6   | 162501019 | t  | c  | 0.5448 | 1.17    | 0.157   | 0.0788 | 0.04621 | 2687 | PARKN |
| rs13217906  | 6   | 161804399 | a  | g  | 0.1024 | 0.76231 | -0.2714 | 0.1363 | 0.04647 | 2687 | PARKN |
| rs10806755  | 6   | 162495315 | a  | g  | 0.2234 | 1.41468 | 0.3469  | 0.1745 | 0.04677 | 524  | PARKN |
| rs78600213  | 6   | 161939935 | c  | g  | 0.0161 | 1.74334 | 0.5558  | 0.2796 | 0.04686 | 2687 | PARKN |
| rs1893545   | 6   | 162451368 | t  | g  | 0.2005 | 1.21046 | 0.191   | 0.0966 | 0.04804 | 2687 | PARKN |
| rs79948313  | 6   | 162725598 | a  | t  | 0.0592 | 1.33442 | 0.2885  | 0.1462 | 0.04845 | 2687 | PARKN |
| rs138485300 | 6   | 162463415 | a  | c  | 0.0097 | 2.19416 | 0.7858  | 0.3983 | 0.0485  | 2163 | PARKN |
| rs12213394  | 6   | 161797681 | a  | g  | 0.1021 | 0.76414 | -0.269  | 0.1364 | 0.04859 | 2687 | PARKN |
| rs12213397  | 6   | 161797690 | t  | g  | 0.1021 | 0.76414 | -0.269  | 0.1364 | 0.04859 | 2687 | PARKN |

| <b>SNP</b>  | <b>CHR</b> | <b>BP</b> | <b>A1</b> | <b>A2</b> | <b>AF</b> | <b>HR</b> | <b>Beta</b> | <b>SE</b> | <b>P</b> | <b>N</b> | <b>GENE</b> |
|-------------|------------|-----------|-----------|-----------|-----------|-----------|-------------|-----------|----------|----------|-------------|
| rs10806754  | 6          | 162495290 | t         | g         | 0.7747    | 0.70957   | -0.3431     | 0.1741    | 0.04877  | 524      | PARKN       |
| rs117406278 | 6          | 162431177 | t         | c         | 0.9295    | 0.64025   | -0.4459     | 0.2267    | 0.04914  | 524      | PARKN       |
| rs13191078  | 6          | 162476705 | a         | c         | 0.4528    | 0.85607   | -0.1554     | 0.079     | 0.04927  | 2687     | PARKN       |
| rs1018462   | 6          | 162141896 | a         | g         | 0.6623    | 0.85266   | -0.1594     | 0.0811    | 0.04945  | 2687     | PARKN       |
| rs146701725 | 6          | 162725858 | c         | g         | 0.0142    | 3.35483   | 1.2104      | 0.6161    | 0.04945  | 282      | PARKN       |
| rs2849565   | 6          | 162452162 | a         | g         | 0.1475    | 1.23937   | 0.2146      | 0.1093    | 0.04947  | 2687     | PARKN       |
| rs139103004 | 6          | 162416907 | t         | c         | 0.0138    | 2.18475   | 0.7815      | 0.3978    | 0.04949  | 1014     | PARKN       |
| rs9458252   | 6          | 161860169 | t         | c         | 0.5577    | 0.8559    | -0.1556     | 0.0795    | 0.05029  | 2687     | PARKN       |



**eTable 10. Table of SNPs used to derive the GRS in the TPD cohort**

| <b>SNP</b>  | <b>CHR</b> | <b>BP</b> | <b>MAF</b> | <b>BETA</b> | <b>SE</b> | <b>P-value</b> |
|-------------|------------|-----------|------------|-------------|-----------|----------------|
| 4:32435284  | 4          | 32435284  | 0.0194     | 1.1245      | 0.1866    | 1.673e-09      |
| 16:17044975 | 16         | 17044975  | 0.9764     | -1.14       | 0.1962    | 6.265e-09      |
| 1:53778300  | 1          | 53778300  | 0.0233     | 1.0163      | 0.1796    | 1.527e-08      |
| 1:168645690 | 1          | 168645690 | 0.0466     | 0.7671      | 0.1423    | 7.037e-08      |
| 1:80950480  | 1          | 80950480  | 0.9548     | -0.7594     | 0.1419    | 8.692e-08      |
| 9:22664277  | 9          | 22664277  | 0.0143     | 1.2588      | 0.2356    | 9.192e-08      |
| 2:47299166  | 2          | 47299166  | 0.019      | 1.0791      | 0.205     | 1.416e-07      |
| 13:73750127 | 13         | 73750127  | 0.0672     | 0.6937      | 0.1343    | 2.41e-07       |
| 3:8537619   | 3          | 8537619   | 0.9334     | -0.6374     | 0.1256    | 3.856e-07      |
| 3:4714509   | 3          | 4714509   | 0.0287     | 0.8517      | 0.1693    | 4.901e-07      |
| 2:242660630 | 2          | 242660630 | 0.0144     | 1.237       | 0.2459    | 4.905e-07      |
| 12:48124937 | 12         | 48124937  | 0.0187     | 1.0675      | 0.2124    | 4.989e-07      |
| 5:108270767 | 5          | 108270767 | 0.0137     | 1.2506      | 0.2509    | 6.221e-07      |

| <b>SNP</b>  | <b>CHR</b> | <b>BP</b> | <b>MAF</b> | <b>BETA</b> | <b>SE</b> | <b>P-value</b> |
|-------------|------------|-----------|------------|-------------|-----------|----------------|
| 8:138767782 | 8          | 138767782 | 0.0348     | 0.8365      | 0.168     | 6.423e-07      |
| 14:22023873 | 14         | 22023873  | 0.9868     | -1.1512     | 0.2321    | 7.04e-07       |
| 7:46390116  | 7          | 46390116  | 0.0224     | 0.9524      | 0.1936    | 8.679e-07      |
| 20:51996645 | 20         | 51996645  | 0.0139     | 1.0939      | 0.2227    | 9.062e-07      |
| 2:176515033 | 2          | 176515033 | 0.0596     | 0.6755      | 0.1376    | 9.191e-07      |
| 4:41614236  | 4          | 41614236  | 0.9878     | -1.2227     | 0.2496    | 9.637e-07      |
| 7:125755287 | 7          | 125755287 | 0.0321     | 0.881       | 0.1801    | 9.986e-07      |
| 11:93486449 | 11         | 93486449  | 0.9842     | -1.2365     | 0.2533    | 1.055e-06      |
| 19:30990206 | 19         | 30990206  | 0.9762     | -1.0323     | 0.2119    | 1.104e-06      |
| 6:16636328  | 6          | 16636328  | 0.0405     | 0.7637      | 0.157     | 1.152e-06      |
| 3:124888091 | 3          | 124888091 | 0.9463     | -0.6963     | 0.1432    | 1.166e-06      |
| 1:81453727  | 1          | 81453727  | 0.9875     | -1.1372     | 0.2342    | 1.204e-06      |
| 19:954677   | 19         | 954677    | 0.0266     | 0.9056      | 0.1867    | 1.233e-06      |
| 16:78198192 | 16         | 78198192  | 0.2731     | 0.4042      | 0.0835    | 1.287e-06      |

| <b>SNP</b>  | <b>CHR</b> | <b>BP</b> | <b>MAF</b> | <b>BETA</b> | <b>SE</b> | <b>P-value</b> |
|-------------|------------|-----------|------------|-------------|-----------|----------------|
| 4:64494944  | 4          | 64494944  | 0.0206     | 0.9275      | 0.1923    | 1.414e-06      |
| 5:132249144 | 5          | 132249144 | 0.016      | 1.0617      | 0.2204    | 1.462e-06      |
| 2:62427404  | 2          | 62427404  | 0.0191     | 0.9786      | 0.2032    | 1.463e-06      |
| 15:61097179 | 15         | 61097179  | 0.0174     | 1.4453      | 0.3005    | 1.514e-06      |
| 8:103719246 | 8          | 103719246 | 0.0113     | 1.3437      | 0.2804    | 1.656e-06      |
| 3:128349376 | 3          | 128349376 | 0.9599     | -0.7262     | 0.1516    | 1.672e-06      |
| 1:106719668 | 1          | 106719668 | 0.0302     | 0.8321      | 0.1739    | 1.707e-06      |
| 7:157406470 | 7          | 157406470 | 0.9203     | -0.5601     | 0.1171    | 1.733e-06      |
| 9:124098846 | 9          | 124098846 | 0.0199     | 0.9737      | 0.2047    | 1.972e-06      |
| 18:1941742  | 18         | 1941742   | 0.0169     | 1.039       | 0.2187    | 2.035e-06      |
| 5:75719143  | 5          | 75719143  | 0.0156     | 1.2049      | 0.2538    | 2.052e-06      |
| 13:29849305 | 13         | 29849305  | 0.023      | 0.8936      | 0.1883    | 2.084e-06      |
| 13:95085417 | 13         | 95085417  | 0.1269     | 0.4899      | 0.1035    | 2.204e-06      |
| 4:94768877  | 4          | 94768877  | 0.0118     | 1.1815      | 0.2501    | 2.317e-06      |

| <b>SNP</b>   | <b>CHR</b> | <b>BP</b> | <b>MAF</b> | <b>BETA</b> | <b>SE</b> | <b>P-value</b> |
|--------------|------------|-----------|------------|-------------|-----------|----------------|
| 18:54853305  | 18         | 54853305  | 0.023      | 0.9298      | 0.1977    | 2.57e-06       |
| 6:115767948  | 6          | 115767948 | 0.0256     | 0.8527      | 0.1819    | 2.765e-06      |
| 6:118528190  | 6          | 118528190 | 0.0334     | 0.8212      | 0.1756    | 2.932e-06      |
| 13:110061713 | 13         | 110061713 | 0.1381     | 0.4664      | 0.0998    | 2.999e-06      |
| 16:686398    | 16         | 686398    | 0.9824     | -1.0484     | 0.2247    | 3.081e-06      |
| 12:131890366 | 12         | 131890366 | 0.0111     | 1.2191      | 0.2621    | 3.301e-06      |
| 5:134774168  | 5          | 134774168 | 0.0111     | 1.4659      | 0.3159    | 3.49e-06       |
| 4:31553640   | 4          | 31553640  | 0.9863     | -1.1423     | 0.2463    | 3.531e-06      |
| 3:5287334    | 3          | 5287334   | 0.9855     | -1.1169     | 0.2411    | 3.61e-06       |
| 7:157515114  | 7          | 157515114 | 0.0131     | 1.0623      | 0.2294    | 3.629e-06      |
| 18:42296688  | 18         | 42296688  | 0.0127     | 1.216       | 0.2627    | 3.662e-06      |
| 2:37411014   | 2          | 37411014  | 0.9597     | -0.715      | 0.1544    | 3.662e-06      |
| 3:73128332   | 3          | 73128332  | 0.9876     | -1.2229     | 0.2643    | 3.728e-06      |
| 11:4852271   | 11         | 4852271   | 0.0892     | 0.5495      | 0.119     | 3.902e-06      |

| <b>SNP</b>  | <b>CHR</b> | <b>BP</b> | <b>MAF</b> | <b>BETA</b> | <b>SE</b> | <b>P-value</b> |
|-------------|------------|-----------|------------|-------------|-----------|----------------|
| 11:99250689 | 11         | 99250689  | 0.0193     | 0.9499      | 0.2058    | 3.906e-06      |
| 13:95774697 | 13         | 95774697  | 0.9329     | -0.5648     | 0.1224    | 3.952e-06      |
| 1:78130243  | 1          | 78130243  | 0.2654     | 0.3958      | 0.0859    | 4.034e-06      |
| 1:71964730  | 1          | 71964730  | 0.9825     | -0.9834     | 0.2135    | 4.113e-06      |
| 16:20409582 | 16         | 20409582  | 0.9864     | -1.1181     | 0.2432    | 4.268e-06      |
| 9:81601411  | 9          | 81601411  | 0.0207     | 1.047       | 0.2278    | 4.291e-06      |
| 11:6636154  | 11         | 6636154   | 0.0133     | 1.2502      | 0.2722    | 4.364e-06      |
| 20:6363480  | 20         | 6363480   | 0.3078     | 0.3717      | 0.081     | 4.494e-06      |
| 14:59208732 | 14         | 59208732  | 0.1591     | 0.454       | 0.099     | 4.529e-06      |
| 8:135945999 | 8          | 135945999 | 0.9825     | -1.037      | 0.2266    | 4.732e-06      |
| 3:82436301  | 3          | 82436301  | 0.0108     | 1.3701      | 0.2997    | 4.853e-06      |
| 1:55014822  | 1          | 55014822  | 0.9634     | -0.7579     | 0.1659    | 4.945e-06      |

**eTable 11. MoCa and UPDRS score comparison between PD-LiD and PD groups**

| Variable        | method                                            | p.value | statistic | PD group mean(sd) | PD-LiD group mean(sd) |
|-----------------|---------------------------------------------------|---------|-----------|-------------------|-----------------------|
| moca_bl         | Wilcoxon rank sum test with continuity correction | 2.1e-05 | 73754.5   | 25.16(3.31)       | 26.09(3.56)           |
| moca_visit      | Wilcoxon rank sum test with continuity correction | 0.01    | 77249.5   | 24.34(4.77)       | 25.35(4.11)           |
| updrs_III_bl    | Welch Two Sample t-test                           | 0.15    | -1.45     | 22.2(11.6)        | 23.72(12.1)           |
| updrs_III_visit | Welch Two Sample t-test                           | 0.25    | 1.15      | 31.91(16.7)       | 30.42(14.0)           |

moca\_bl = Moca average scores for the LiD and PD group at baseline

moca\_visit = Moca average scores for the LiD and PD group at the time LiD was developed or at the last visit available

updrsIII\_bl = MDS-UPDRS III averages scores for the LiD and PD group at baseline

Updrs\_iii\_visit = MDS-UPDRS III average scores for the LiD and PD group at the time LiD was developed or at the last visit available

## 2. eFigures.

eFigure 1. Quality control flowchart

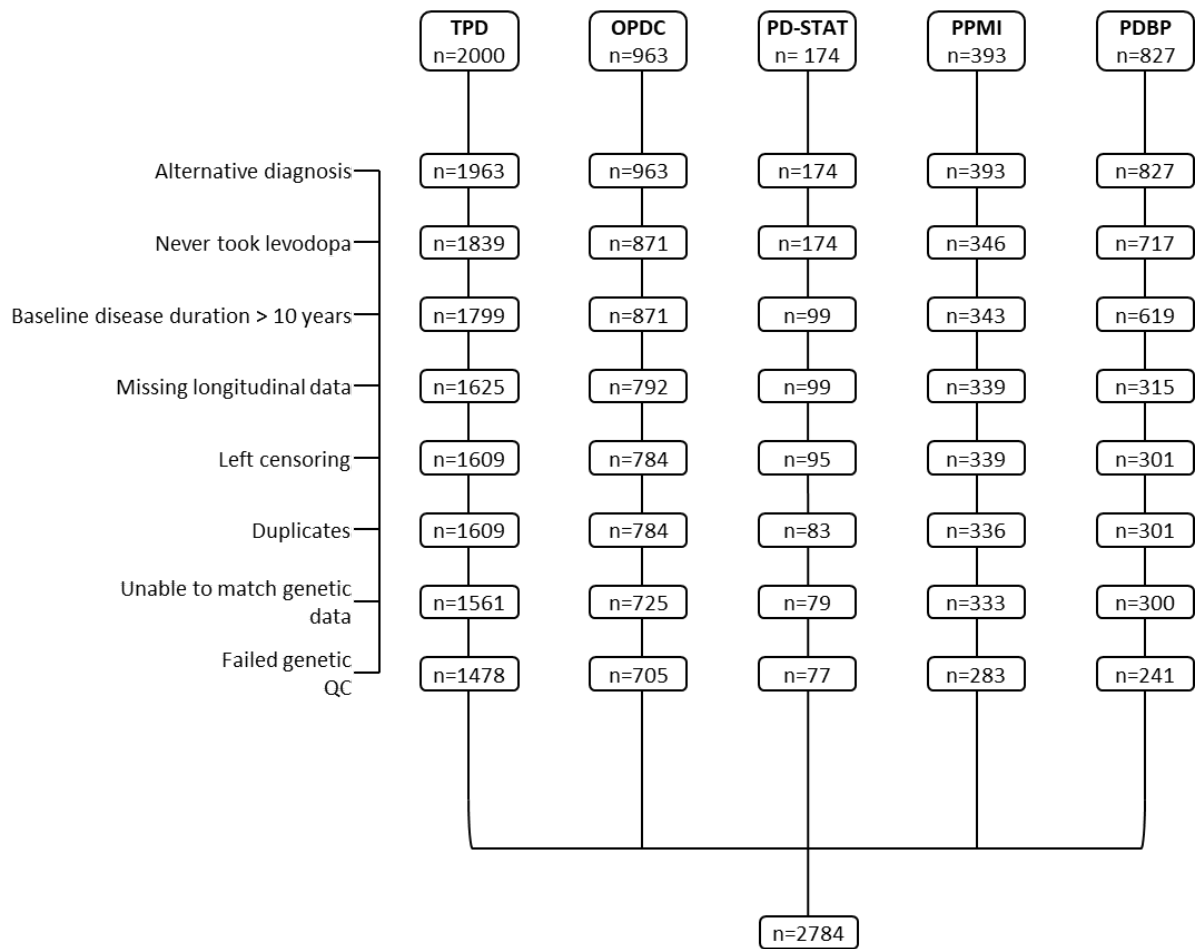

**eFigure 2. LiD risk factors Kaplan Meyer curves.** Kaplan-Meier curve for Survival probability (LiD free probability) based on sex (A), age at onset (AAO) (B), smoking status (C), and smoking status baseline body mass index (BMI). The P-value (P) showing the significance of differences on the survival probability is given on each plot. Number at risk represents the number of PD patients remaining on the study at the different time points (0, 5, 10, 15 years). The colour expansion on each curve represents the confidence interval (CI).

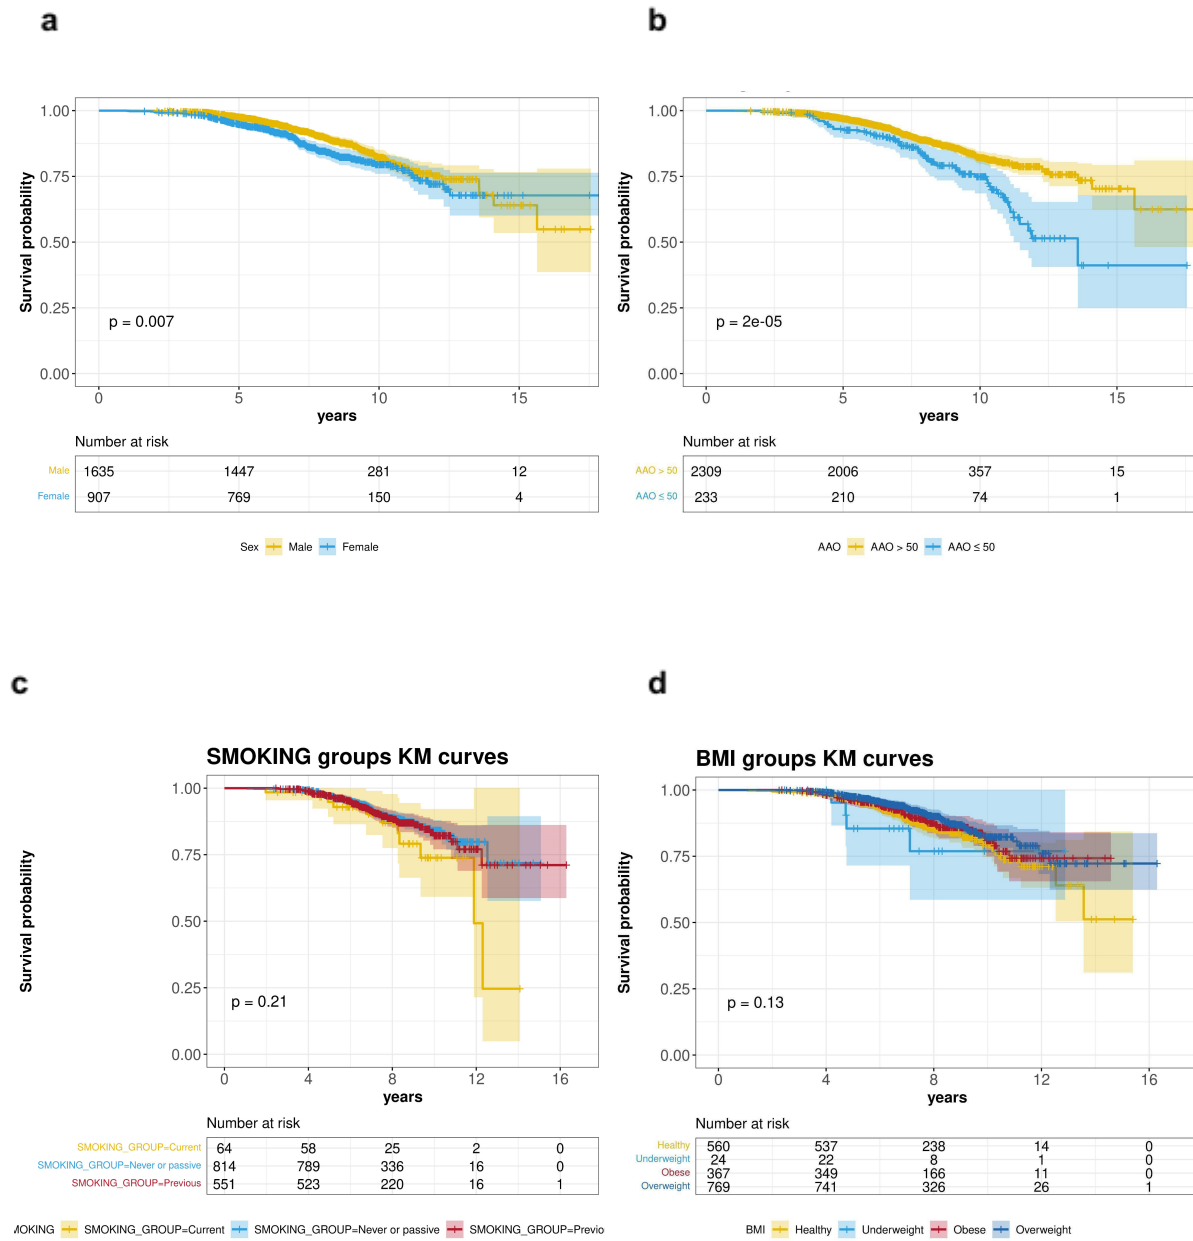

Previous = Previous smoker from baseline  
 Current = Current smoker at baseline  
 Never or passive = Never or passive smoker at baseline



**eFigure 3. Power calculation and simulation.** Power calculation and simulation to detect genetic association with time to develop LID as a function of sample size, relative allele frequency (AF), and genetic hazard ratio (GHR). a) Power calculation (y-axis) for the current sample size based on different AFs (x-axis) (graph label) ; b) Power simulation to explore the increase in power (y-axis) to detect lower GHR (graph grid) and relative AFs (graph label) as we increase the sample size (x-axis)

**a**

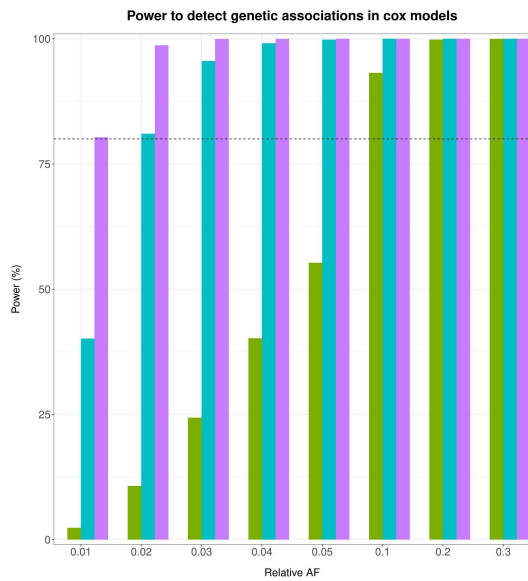

**b**

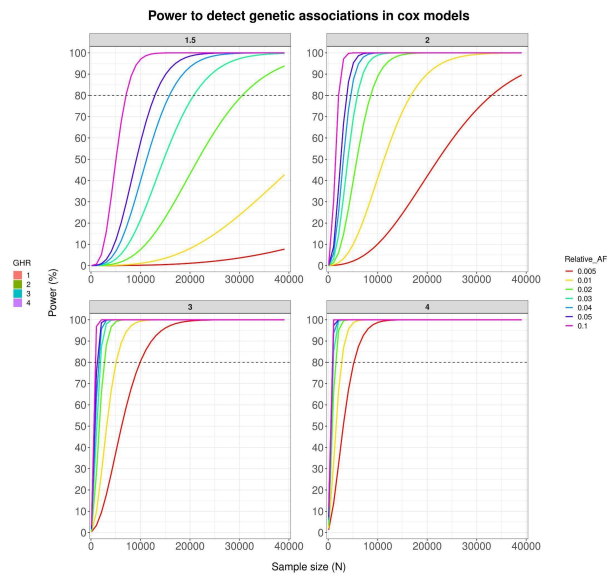

**eFigure 4. SNP metrics correlation between the CPH basic and best models.** Correlation between SNP regression coefficients (A) and SNP test-statistic (B) in from the basic and the adjusted model. The Pearson correlation coefficient  $R$  and the significance ( $p$ ) is given.

**a**

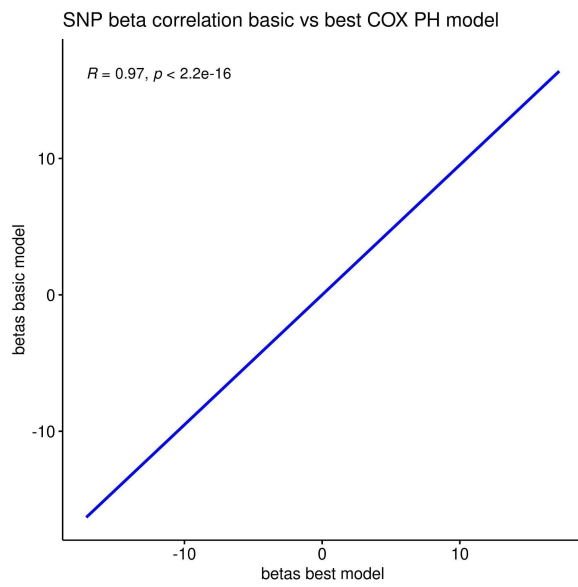

**b**

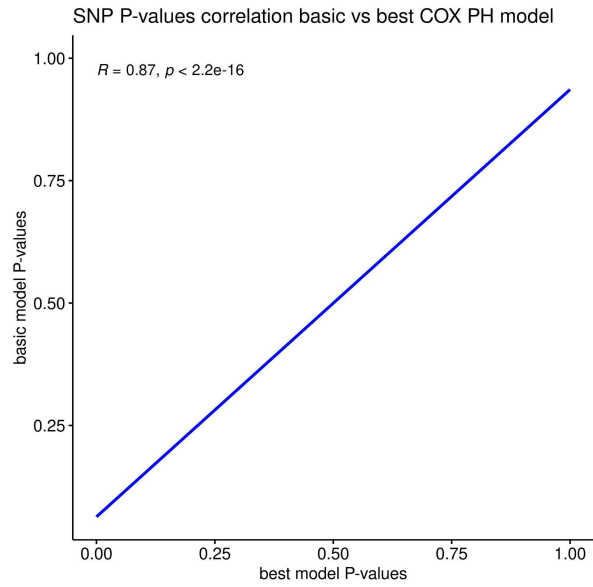

**eFigure 5. LRP8 locus fine-mapping and top 5 TFBS marks.** From top to bottom, *LRP8* transcript plot, locus plot, the fine-mapping nominated variants across fine-mapping tools, and the top 4 ENCODE TFBS peaks in the *XYLT1* locus. In the locus plot, the SNPs are coloured in red as LD (given by  $R^2$ ) increases, and blue as the LD decreases. In the fine-mapping track, we highlight the SNPs with the highest posterior probabilities for each fine-mapping tool (ABF, FINEMAP, SUSIE, POLYFUN\_SUSIE). In addition, we highlight in yellow the Consensus SNP with the highest mean Posterior Probability (mean). The next four rows show the transcription factor binding sites (TFBS) densities (y-axis) measured on different cell lines and laboratories. XGR finds the top 5 transcription factors (TF) with the highest binding activity in the track genomic window. These top 5 TF are displayed in the Assay label.

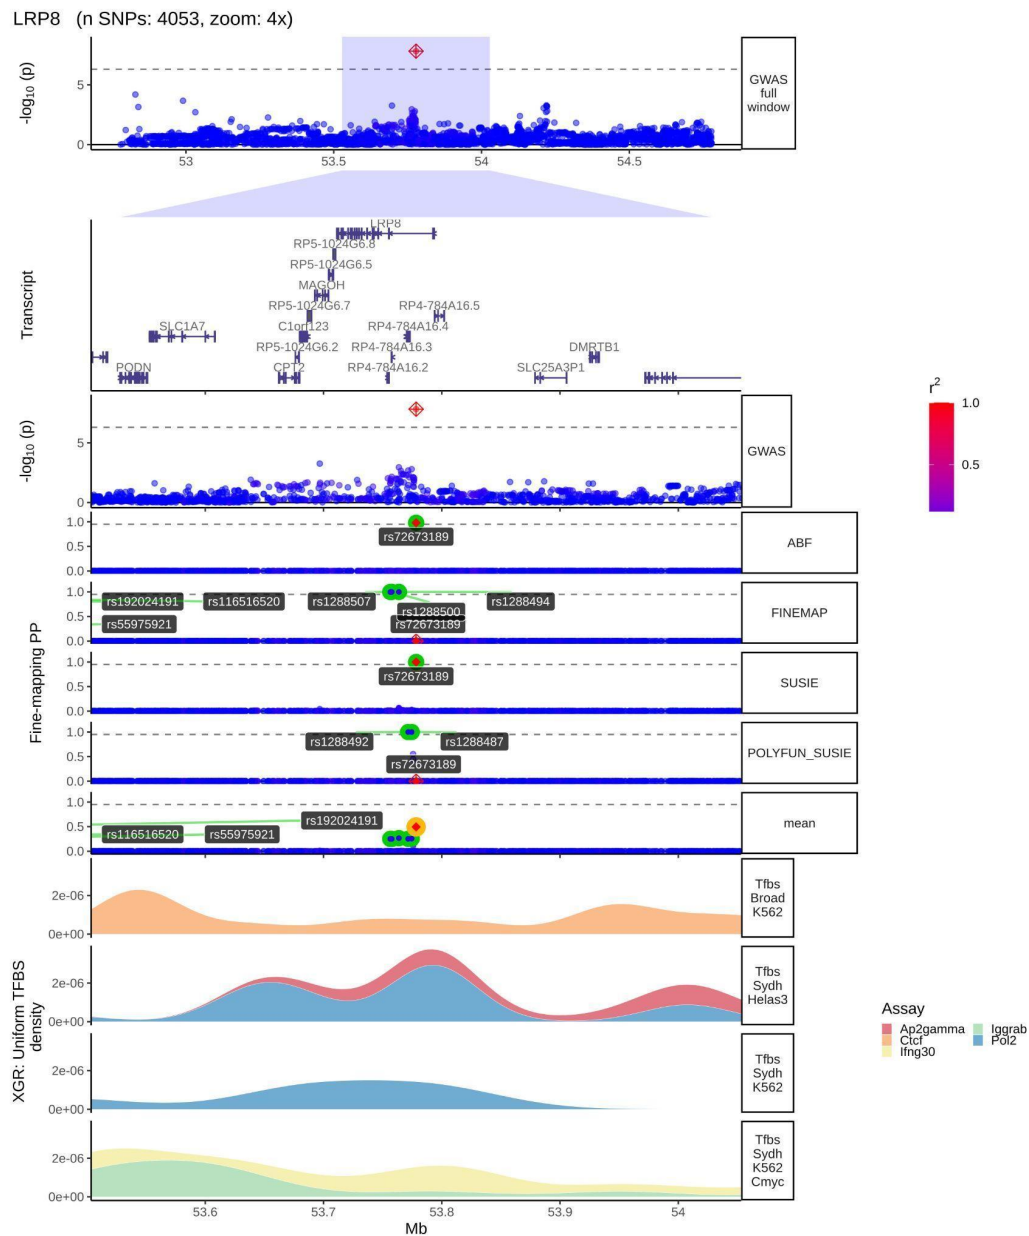

**eFigure 6. XYLT1 locus fine-mapping and brain cell type specific regulatory marks.** From top to bottom, transcript plot, locus plot, the fine-mapping nominated variants across fine-mapping tools, brain cell type specific regulatory element marks. In the locus plot, the SNPs are coloured in red as LD ( $r^2$ ) increases, and blue as the LD decreases. In the fine-mapping track, we highlight the SNPs with the highest posterior probabilities for each fine-mapping tool (ABF, FINEMAP, SUSIE, POLYFUN\_SUSIE). In addition, we highlight in yellow the Consensus SNP with the highest mean Posterior Probability (mean). In the cell type specific regulatory element marks, the first 4 rows are the density marks (y-axis) from ATAC-seq assay (in pink), and CHIP-seq assays (H3K27ac in blue, and H3K4me3 in cyan), in astrocytes, microglia, neurons, and oligodendrocytes. The next four rows are the distal anchored chromatin loops (black curves). We see how, only in neurons, there is a chromatin loop forming from the *XYLT1* GWS and the fine-mapped consensus variant towards the *LRP8* promoter (purple).

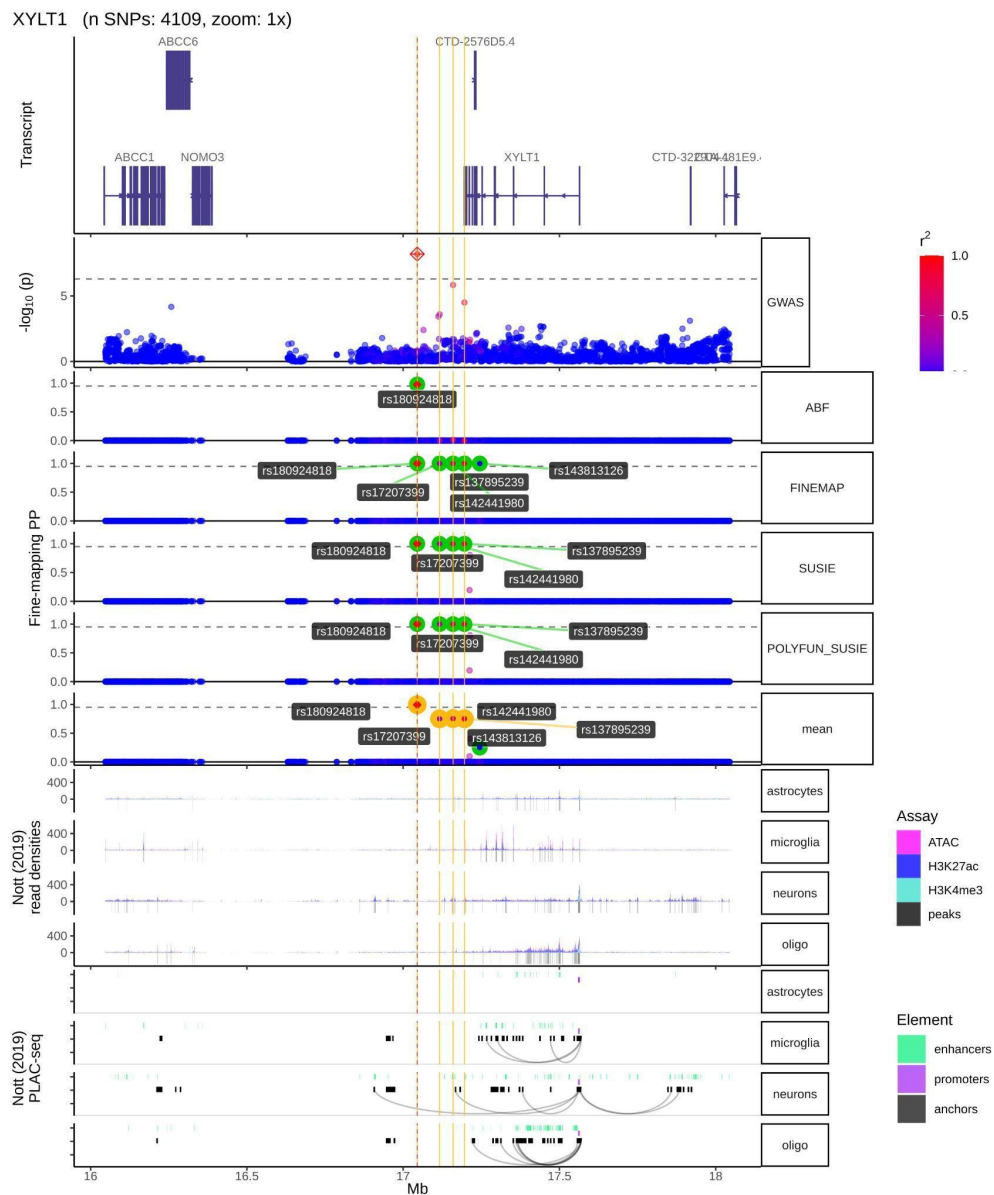

**eFigure 7. XYLT1 locus fine-mapping and top 5 TFBS marks.** From top to bottom, *XYLT1* transcript plot, locus plot, the fine-mapping nominated variants across fine-mapping tools, and the top 4 ENCODE TFBS peaks in the *XYLT1* locus. In the locus plot, the SNPs are coloured in red as LD ( $R^2$ ) increases, and blue as the LD decreases. In the fine-mapping track, we highlight the SNPs with the highest posterior probabilities for each fine-mapping tool (ABF, FINEMAP, SUSIE, POLYFUN\_SUSIE). In addition, we highlight in yellow the Consensus SNP with the highest mean Posterior Probability (mean). The next four rows show the transcription factor binding sites (TFBS) densities (y-axis) measured on different cell lines and laboratories. XGR finds the top 5 transcription factors (TF) with the highest binding activity in the track genomic window. These top 5 TF are displayed in the Assay label.

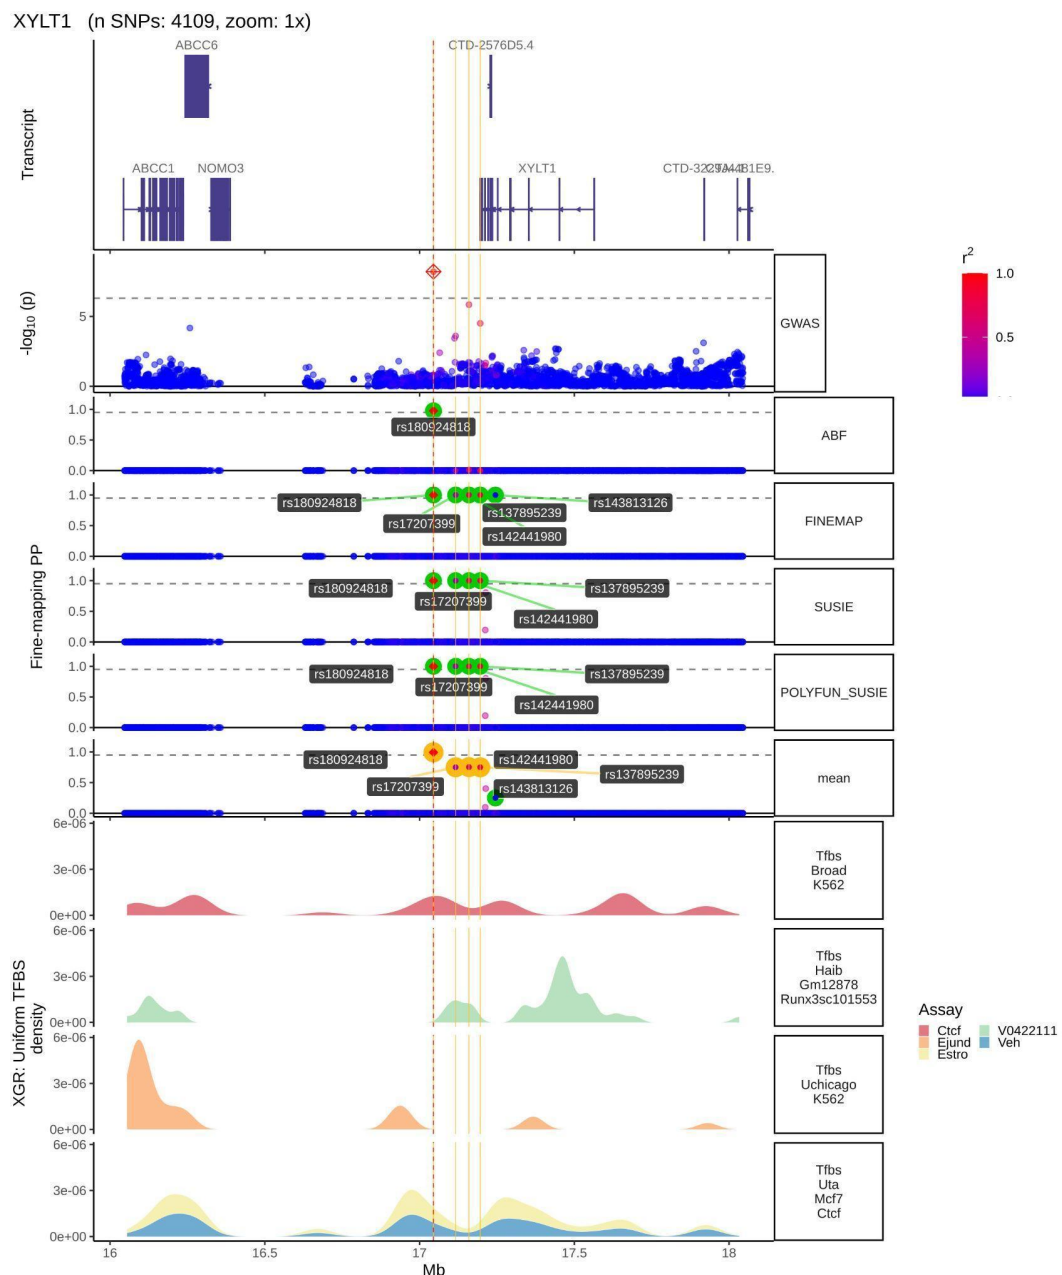

**eFigure 8. PRS Receiver operating characteristic (ROC) curves.** ROC curves for patient specific PRS measures derived on TPD (A) and OPDC (B) cohorts. The red curve represents the area under the curve (AUC) true positive (sensitivity) versus false positive rate (1 - Specificity) rate.

**a**

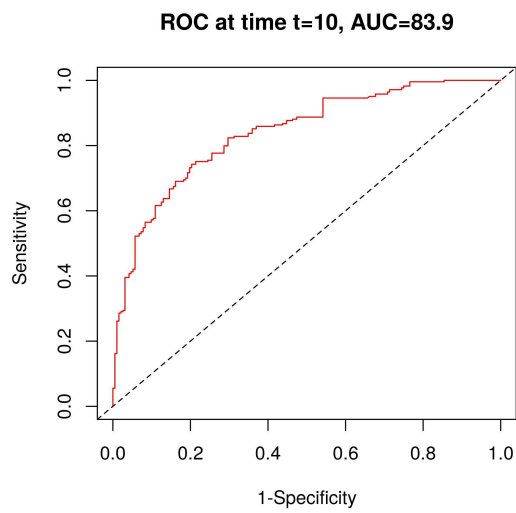

**b**

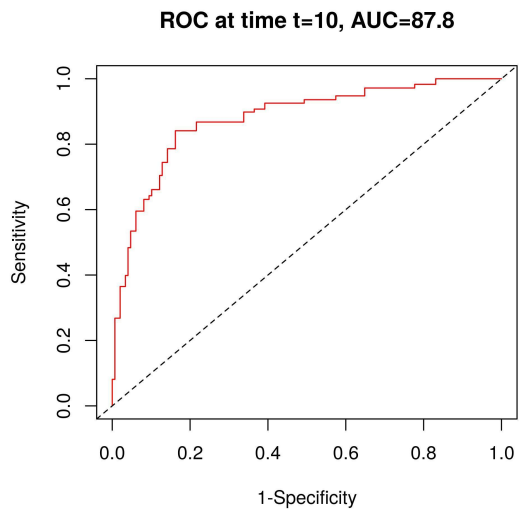

**eFigure 9. Precision-recall curves (PROC) and the area under the curve for unweighted data.** PROC curves for PD and LiD patients PRS. a) PROC PRS in Tracking Parkinson's and b) PROC PRS in OPDC. The color scale on the right side of the plot gives an indication, which classification threshold results in a certain point on the curve. PR = Precision recall. Precision = Positive predictive value. Recall = Sensitivity

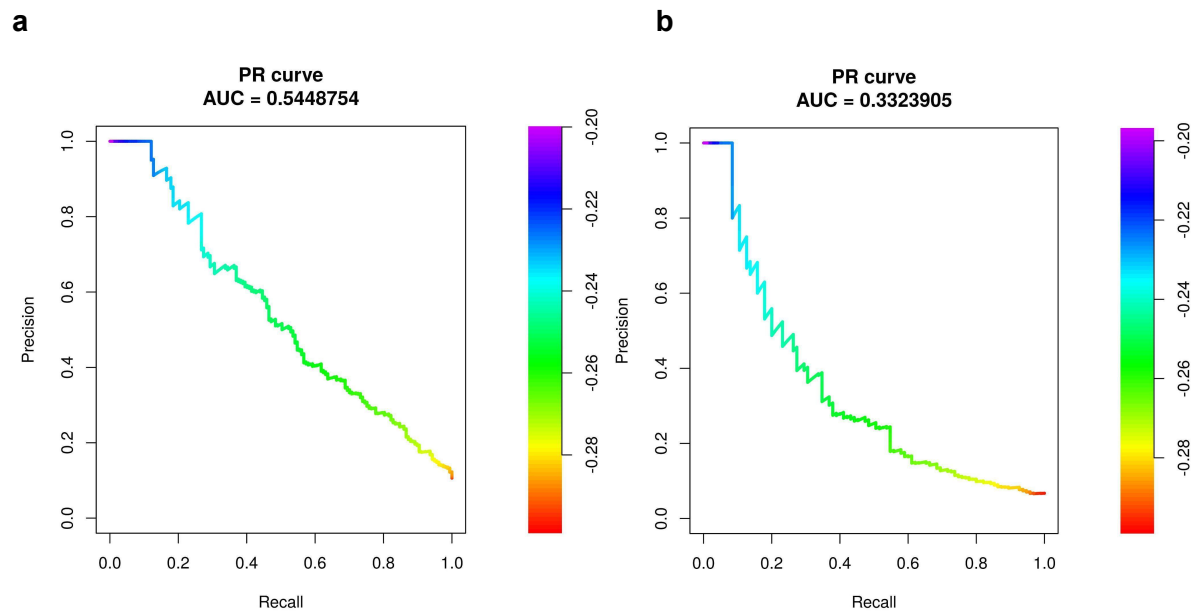

### 3. eData.

#### eData 1. List of all covariates included in the stepwise regression model

SEX,MDSUPDRSIII,PC1,PC2,PC3,PC4,PC5,AAO.std,Ldopa\_previous,disease\_duration\_diag,Ldopa\_bin,LEDD\_levo,LEDD\_total\_V1,Amantadine\_bin\_V1,Anticholinergic\_bin\_V1,COMTI\_bin\_V1,DA\_bin\_V1,MAOBI\_bin\_V1,drug\_naive\_V1,Centre,dob,disease\_duration,disease\_duration\_diag\_cat,time\_onset\_to\_diag,ethnicity\_all,demo\_QRISK,handedness,religion,marital\_status,car\_ownership,housing\_tenure,years\_education\_bin,BMI,weight,height,Pulse\_rate\_lying,Pulse\_rate\_standing,Systolic\_BP\_lying,Systolic\_BP\_standing,Diastolic\_BP\_lying,Diastolic\_BP\_standing,SBP\_postural\_drop,DBP\_postural\_drop,pulse\_postural\_drop,orthostatic\_hypotension,probability\_pd,PDQ8\_total,ESS\_total,RBD\_total,restless\_legs,EQ5D\_index,EQ5D\_vas\_score,constip\_cat,gastro\_total,Leeds\_anx\_total,Leeds\_anx\_bin,Leeds\_dep\_total,Leeds\_dep\_bin,QUIP\_all,MOCA\_total,seman\_flu\_score,scopa\_aut\_gastro,scopa\_aut\_urinary,scopa\_aut\_cardio,scopa\_aut\_thermo,scopa\_aut\_pupillo,NMSS\_cardio,NMSS\_sleep,NMSS\_mood,NMSS\_perception,NMSS\_attention,NMSS\_gastro,NMSS\_urinary,NMSS\_sexual,NMSS\_misc,PDSS\_total,LEDD\_total,drug\_naive,Amantadine\_bin,Anticholinergic\_bin,COMTI\_bin,DA\_bin,MAOBI\_bin,Amantadine\_previous,Anticholinergic\_previous,COMTI\_previous,DA\_previous,MAOBI\_previous,hoehn\_and\_yahr\_stage,Schwab\_england,UPDRS\_I\_total,UPDRS\_II\_total,patients\_clinical\_state,UPDRS\_hallucinations,UPDRS\_fatigue,UPDRS\_pain,UPDRS\_constipation,UPDRS\_rigidity,UPDRS\_bradikinesia,UPDRS\_laterality,UPDRS\_laterality\_bin,side\_affected\_onset,FSAD\_a1,FSAD\_a2,FSAD\_a3,FSAD\_a4,FSAD\_a41,FSAD\_a42,FSAD\_a43,FSAD\_a45,FSAD\_other\_text,SCF\_tremor\_a11,SCF\_tremor\_a12,SCF\_tremor\_a13,SCF\_tremor\_a14,SCF\_tremor\_other\_text,SCF\_rigid\_a21,SCF\_rigid\_a22,SCF\_rigid\_a23,SCF\_rigid\_a24,SCF\_rigid\_a25,SCF\_rigid\_a26,SCF\_rigid\_other\_text,SCF\_bradya31,SCF\_bradya32,SCF\_bradya33,SCF\_bradya34,SCF\_bradya35,SCF\_bradya\_other\_text,SCF\_posture\_a41,SCF\_posture\_a42,SCF\_posture\_a43,SCF\_posture\_a45,SCF\_posture\_other\_text,SCF\_hyperkinesias\_a51,SCF\_hyperkinesias\_a52,SCF\_hyperkinesias\_a53,SCF\_hyperkinesias\_a54,SCF\_hyperkinesias\_other\_text,SCF\_hemiatrophy\_a6,SCF\_autonomic\_a71,SCF\_autonomic\_a73,SCF\_oculomotor\_a8,SCF\_eyelid\_a9,SCF\_otherneuro\_Hyperreflexia,SCF\_otherneuro\_Babinski\_sign,SCF\_otherneuro\_Sensory\_deficit,SCF\_otherneuro\_Amyotrophy,SCF\_otherneuro\_Limb\_apraxia,SCF\_otherneuro\_Sleep\_apnea,SCF\_otherneuro\_Dysmetria,SCF\_otherneuro\_other,SCF\_response\_a11,SCF\_tachyphemia\_a12,SCF\_unusual\_Presentation,SCF\_unusual\_Symptoms,SCF\_unusual\_Course,SCF\_unusual\_response,SCF\_unusual\_Other,SCF\_specify\_unusual,history\_angina,history\_heart\_fail,history\_stroke,history\_heart\_att,history\_diabetes,type\_1\_diabetes,type\_2\_diabetes,history\_cholesterol,history\_high\_bp,vascular\_cat,heart\_disease,vascular\_risk,history\_bowel,history\_prostate,history\_breast,history\_asthma,history\_bronch,history\_emphysema,history\_arthritis,history\_other,adopted,mother\_pd,father\_pd,matgrand\_pd,patgrand\_pd,matauun\_pd,patauun\_pd,sum\_fmhx\_pd,first\_degree\_rel\_pd,second\_degree\_rel\_pd,recessive\_PD\_history,dominant\_PD\_history,mother\_stroke,mother\_dement\_and\_alz,father\_stroke,father\_dement\_and\_alz,brother\_stroke,brother\_dement\_and\_alz,sister\_stroke,sister\_dement\_and\_alz,halfsib\_dement\_and\_alz,matgrandfather\_stroke,matgrandfather\_dement\_and\_alz,matgrandmother\_stroke,matgrandmother\_dement\_and\_alz,patgrandfather\_stroke,patgrandfather\_dement\_and\_alz,patgrandmother\_stroke,patgrandmother\_dement\_and\_alz,matau\_stroke,matau\_dement\_and\_alz,patau\_stroke,patau\_dement\_and\_alz,mother\_only\_stroke,maternal\_stroke,father\_only\_stroke,paternal\_stroke,mother\_only\_dement\_and\_alz,maternal\_dement\_and\_alz,father\_only\_dement\_and\_alz,paternal\_dement\_and\_alz,drugs\_cardio,drugs\_cardio\_group\_1,drugs\_cardio\_group\_2,drugs\_cardio\_group\_3,drugs\_cardio\_group\_4,drugs\_cardio\_group\_5,drugs\_cardio\_group\_6,drugs\_cardio\_group\_7,drugs\_cardio\_group\_8,drugs\_cardio\_group\_9,drugs\_lipid,drugs\_diabetic,drugs\_diabetic\_insulin,drugs\_diabetic\_oral,drugs\_painkill,drugs\_painkill\_nsai,drugs\_antiplat,drugs\_anticoags,drugs\_asthmacopd,drugs\_asthmacopd\_broncho,drugs\_asthmacopd\_corticost,drugs\_laxatives,drugs\_bladder,drugs\_antidepress,CISIPD\_Disability,CISIPD\_Motor\_complications,CISIPD\_Cognitive\_status,merqp\_smoking,smoke\_QRISK,coffee\_prior\_diag,coffee\_current,merqp\_a1\_work\_pesticide,merqp\_a2\_home\_pesticide,merqp\_a3\_work\_solvents,merqp\_a4\_work\_heavymetals,merqp\_a5\_work\_chemicals\_fumes,merqp\_a5\_1,merqp\_a12\_oophorectomy,merqp\_a13\_depression,merqp\_a14\_anxiety,BFI\_extra\_total,BFI\_agree\_total,BFI\_consci\_total,BFI\_neuro\_total,BFI\_open\_total,CT\_Atrophy,CT\_Small\_vessel\_disease,CT\_Lacunar\_infarction,CT\_Territory\_infarction,CT\_Hydrocephalus,CT\_Other\_abnormalit



y,MRI\_Atrophy,MRI\_Small\_vessel\_disease,MRI\_Lacunar\_infarction,MRI\_Territory\_infarction,MRI\_Hydrocephalus,MRI\_Other\_abnormality,FPCIT\_SPECT\_res,F\_DOPA\_PET\_res,EQ5D\_1,EQ5D\_2,EQ5D\_3,EQ5D\_4,EQ5D\_5,LADS\_1,LADS\_2,LADS\_3,LADS\_4,LADS\_5,LADS\_6,LADS\_7,LADS\_8,LADS\_9,LADS\_10,LADS\_11,LADS\_12,constip1\_bowelfreq,constip2\_laxative,constip3\_fruitvegeuse,constip4\_exercise,GCSI\_a1,GCSI\_a2,GCSI\_a3,GCSI\_a4,GCSI\_a5,GCSI\_a6,GCSI\_a7,GCSI\_a8,saut\_a1\_saut\_a2\_saut\_a3\_saut\_a4\_saut\_a5,saut\_a6\_saut\_a7\_saut\_a14,saut\_a15,saut\_a16,saut\_a17,saut\_a18,saut\_a19,saut\_a20,saut\_a21,saut\_a8\_saut\_a9\_saut\_a10,saut\_a11,saut\_a12,saut\_a13,NMSS\_severity\_score\_1,NMSS\_severity\_score\_2,NMSS\_severity\_score\_3,NMSS\_severity\_score\_4,NMSS\_severity\_score\_5,NMSS\_severity\_score\_6,NMSS\_severity\_score\_7,NMSS\_severity\_score\_8,NMSS\_severity\_score\_9,NMSS\_severity\_score\_10,NMSS\_severity\_score\_11,NMSS\_severity\_score\_12,NMSS\_severity\_score\_13,NMSS\_severity\_score\_14,NMSS\_severity\_score\_15,NMSS\_severity\_score\_16,NMSS\_severity\_score\_17,NMSS\_severity\_score\_18,NMSS\_severity\_score\_19,NMSS\_severity\_score\_20,NMSS\_severity\_score\_21,NMSS\_severity\_score\_22,NMSS\_severity\_score\_23,NMSS\_severity\_score\_24,NMSS\_severity\_score\_25,NMSS\_severity\_score\_26,NMSS\_severity\_score\_27,NMSS\_severity\_score\_28,NMSS\_severity\_score\_29,NMSS\_severity\_score\_30,NMSS\_frequency\_score\_1,NMSS\_frequency\_score\_2,NMSS\_frequency\_score\_3,NMSS\_frequency\_score\_4,NMSS\_frequency\_score\_5,NMSS\_frequency\_score\_6,NMSS\_frequency\_score\_7,NMSS\_frequency\_score\_8,NMSS\_frequency\_score\_9,NMSS\_frequency\_score\_10,NMSS\_frequency\_score\_11,NMSS\_frequency\_score\_12,NMSS\_frequency\_score\_13,NMSS\_frequency\_score\_14,NMSS\_frequency\_score\_15,NMSS\_frequency\_score\_16,NMSS\_frequency\_score\_17,NMSS\_frequency\_score\_18,NMSS\_frequency\_score\_19,NMSS\_frequency\_score\_20,NMSS\_frequency\_score\_21,NMSS\_frequency\_score\_22,NMSS\_frequency\_score\_23,NMSS\_frequency\_score\_24,NMSS\_frequency\_score\_25,NMSS\_frequency\_score\_26,NMSS\_frequency\_score\_27,NMSS\_frequency\_score\_28,NMSS\_frequency\_score\_29,NMSS\_frequency\_score\_30,NMSS\_1,NMSS\_2,NMSS\_3,NMSS\_4,NMSS\_5,NMSS\_6,NMSS\_7,NMSS\_8,NMSS\_9,NMSS\_10,NMSS\_11,NMSS\_12,NMSS\_13,NMSS\_14,NMSS\_15,NMSS\_16,NMSS\_17,NMSS\_18,NMSS\_19,NMSS\_20,NMSS\_21,NMSS\_22,NMSS\_23,NMSS\_24,NMSS\_25,NMSS\_26,NMSS\_27,NMSS\_28,NMSS\_29,NMSS\_30,score\_BFI\_a1,score\_BFI\_a6,score\_BFI\_a11,score\_BFI\_a16,score\_BFI\_a21,score\_BFI\_a26,score\_BFI\_a31,score\_BFI\_a36,score\_BFI\_a2,score\_BFI\_a7,score\_BFI\_a12,score\_BFI\_a17,score\_BFI\_a22,score\_BFI\_a27,score\_BFI\_a32,score\_BFI\_a37,score\_BFI\_a42,score\_BFI\_a3,score\_BFI\_a8,score\_BFI\_a13,score\_BFI\_a18,score\_BFI\_a23,score\_BFI\_a28,score\_BFI\_a33,score\_BFI\_a38,score\_BFI\_a43,score\_BFI\_a4,score\_BFI\_a9,score\_BFI\_a14,score\_BFI\_a19,score\_BFI\_a24,score\_BFI\_a29,score\_BFI\_a34,score\_BFI\_a39,score\_BFI\_a5,score\_BFI\_a10,score\_BFI\_a15,score\_BFI\_a20,score\_BFI\_a25,score\_BFI\_a30,score\_BFI\_a35,score\_BFI\_a40,score\_BFI\_a41,score\_BFI\_a44,Parents\_related,Parents\_relationship,Parents\_other\_relat\_state,Person\_related,Which\_relatives,unusual\_present,unusual\_present\_all,SCF\_unusual\_Presentation\_all,SCF\_unusual\_Symptoms\_all,SCF\_unusual\_Signs\_all,SCF\_unusual\_Course\_all,SCF\_unusual\_response\_all,SCF\_unusual\_Other\_all,prs\_nominal.
